# Supplementary material for: NBS-mediated bromination and dehydrogenation of tetrahydro-quinoline in one pot: scope and mechanistic study
Source: Royal Society of Chemistry journal article supplement (doi:10.1039/d3ra06747e), 2023-01-01
Supplement: d3ra06747e1.pdf [file d3ra06747e1.pdf]

# **NBS-Mediated Bromination and Dehydrogenation of Tetrahydroquinoline in One Pot: Scope and Mechanistic Study**

**Ruchun Yang<sup>a</sup>, Yongge Xiong<sup>a</sup>, Si Deng<sup>a</sup>, Jiang Bai<sup>a</sup>, Xian-Rong Song<sup>\*a</sup> and Qiang Xiao<sup>\*a</sup>**

*<sup>a</sup>Institute of Organic Chemistry, Jiangxi Science & Technology Normal University, Key Laboratory of Organic Chemistry, Jiangxi Province, Nanchang 330013, China.*

*E-mail: songxr2015@163.com, xiaoqiang@tsinghua.org.cn*

## **Table of Contents**

- 1. Crystal structure of compound 3n**
- 2. General remarks**
- 3. General procedures**
- 4. Characterization Data of Products**
- 5. NMR Spectra for Compounds**

## 1. Crystal structure of compound 3n

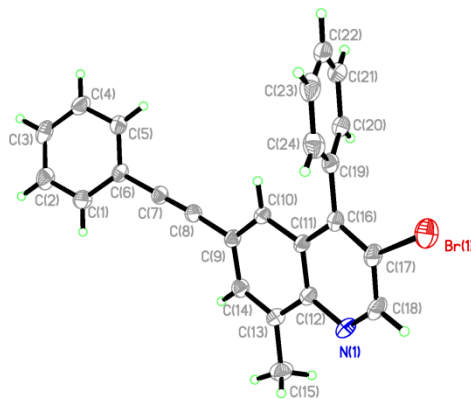

### Datablock: 1

---

|                        |                            |                                    |                            |
|------------------------|----------------------------|------------------------------------|----------------------------|
| Bond precision:        | C-C = 0.0035 Å             | Wavelength=0.71073                 |                            |
| Cell:                  | a=11.3380 (14)<br>alpha=90 | b=12.4628 (15)<br>beta=106.655 (2) | c=13.4549 (17)<br>gamma=90 |
| Temperature:           | 296 K                      |                                    |                            |
| Volume                 | Calculated<br>1821.5 (4)   | Reported<br>1821.5 (4)             |                            |
| Space group            | P 21/n                     | P 21/n                             |                            |
| Hall group             | -P 2yn                     | -P 2yn                             |                            |
| Moiety formula         | C24 H16 Br N               | ?                                  |                            |
| Sum formula            | C24 H16 Br N               | C24 H16 Br N                       |                            |
| Mr                     | 398.28                     | 398.29                             |                            |
| Dx, g cm <sup>-3</sup> | 1.452                      | 1.452                              |                            |
| Z                      | 4                          | 4                                  |                            |
| Mu (mm <sup>-1</sup> ) | 2.263                      | 2.263                              |                            |
| F000                   | 808.0                      | 808.0                              |                            |
| F000'                  | 807.11                     |                                    |                            |
| h, k, lmax             | 13, 14, 16                 | 13, 14, 16                         |                            |
| Nref                   | 3197                       | 3192                               |                            |
| Tmin, Tmax             | 0.561, 0.581               |                                    |                            |
| Tmin'                  | 0.550                      |                                    |                            |
| Correction method=     | Not given                  |                                    |                            |
| Data completeness=     | 0.998                      | Theta (max) = 25.000               |                            |
| R(reflections)=        | 0.0344 ( 2334)             | wR2(reflections)= 0.0932 ( 3192)   |                            |
| s =                    | 0.990                      | Npar= 236                          |                            |

---

FigS1 Crystal structure of compound 3n

## 2. General remarks

All reagents were purchased from commercial sources and used without further treatment, unless otherwise indicated. Chloroform (CHCl<sub>3</sub>) was purchased from Adamas Company, safe dry, water < 50 ppm. <sup>1</sup>H and <sup>13</sup>C NMR spectra were recorded on Bruker 400 MHz spectrometers, chemical shifts are given in parts per million (ppm) relative to standard tetramethylsilane (0.00 ppm for <sup>1</sup>H NMR) or residual solvent peaks for <sup>13</sup>C NMR. HRMS was obtained using a Q-TOF instrument equipped with ESI source. Standard column chromatography was performed on 200-300 mesh silica gel. using flash column chromatography techniques.

## 3. General procedures

### 3.1 General procedure for the synthesis of raw material

**1q** and **1r** were purchased from Adamas company and used without further treatment, **1a-1p** were synthesized according to the literature <sup>[1]</sup>.

### 3.2 General procedure for the construction of **2a-2r** via bromination and dehydrogenation reaction

NBS (177.0 mg, 1.0 mmol) was added in batches to the solution of **1a-1r** (0.2 mmol) in CHCl<sub>3</sub> (2.0 mL). The reaction mixture was then stirred for 10 min at room temperature. After the reaction completion was monitored by TLC, the reaction mixture was quenched and then extracted with CH<sub>2</sub>Cl<sub>2</sub> (3×5 mL). Subsequently, the obtained organic layer was dried with Na<sub>2</sub>SO<sub>4</sub> and concentrated. The residue was purified by flash chromatography on silica gel to produce **2a-2r**.

### 3.3 General procedure for the synthesis of 3-bromo-8-methyl-4-phenyl-6-(phenylethynyl) quinoline (**3n**)

The reaction was performed under argon atmosphere and then added 3,6-dibromo-4-phenyl-8-methyl-quinoline **2n** (0.90 g, 2.40 mmol), phenylacetylene (0.245 g, 2.40 mmol), CuI (0.046 g, 0.24 mmol), Pd(PPh<sub>3</sub>)<sub>2</sub>Cl<sub>2</sub> (0.014 g, 0.12 mmol) in a reaction flask. And reaction solvents THF (20 mL) and Et<sub>3</sub>N (7 mL) were added to the reaction system, and placed the reaction mixture at 50 °C to stir for 12 h. Subsequently, the phenylacetylene (0.135 g) was added into the above reaction solution per time at 12 h interval until the **2n** was consumed. After the reaction completion was monitored by TLC, the reaction solution was diluted and then extracted with CH<sub>2</sub>Cl<sub>2</sub> three times. Subsequently, the obtained organic layer was dried with Na<sub>2</sub>SO<sub>4</sub> and concentrated. The residue was purified by flash chromatography on silica gel to produce **3n** in 65% yield.

The colorless solid was recrystallized from the solvent (2% EtOAc in petroleum ether) in a freezer (263 K) to give pure **3n** in the form of colourless needle shaped crystals.

### 3.4 General procedure for the synthesis of 8-methyl-4-phenyl-6-(phenylethynyl)-3-(*p*-tolyl)quinoline (**4n**)

#### -3-(*p*-tolyl)quinoline (**4n**)

The reaction was performed under argon atmosphere and then added 8-methyl-4-phenyl-6-(phenylethynyl)-3-(*p*-tolyl)quinoline **3n** (80.0 mg, 0.20 mmol), 4-tolylboronic acid (40.8 mg, 0.30 mmol), Pd(OAc)<sub>2</sub> (2.25 mg, 0.01 mmol), ligand **L1** (7.8 mg, 0.02 mmol) and K<sub>3</sub>PO<sub>4</sub> (84.9 mg, 0.40 mmol) in a pressure reaction tube. And reaction solvent toluene (2 mL) was added to the reaction system, and placed the reaction mixture at 110 °C to stir for 20 h. After the reaction completion was monitored by TLC, After the mixture was cooled to room temperature, the reaction mixture was then cooled to room temperature. The reaction solution was diluted with water and then extracted with EtOAc three times. Subsequently, the obtained organic layer was dried with Na<sub>2</sub>SO<sub>4</sub> and concentrated. The residue was purified by flash chromatography on silica gel to produce **4n** in 45% yield.

## 4. Characterization Data of Products

### 3,6,8-tribromo-4-phenylquinoline, **2a** [2]

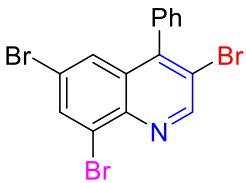 White solid, 70.2 mg, 80%, m.p. 196–197 °C. <sup>1</sup>H NMR (400 MHz, CDCl<sub>3</sub>) δ = 9.13 (s, 1H), 8.13 (s, 1H), 7.59–7.56 (m, 4H), 7.29–7.27 (m, 2H). <sup>13</sup>C NMR (100 MHz, CDCl<sub>3</sub>) δ = 152.9, 147.3, 142.9, 136.0, 135.7, 130.7, 129.2, 129.1, 128.9, 128.3, 126.2, 121.3, 120.7. HRMS (ESI): *m/z* [M+H]<sup>+</sup> calcd for C<sub>15</sub>H<sub>9</sub>Br<sub>3</sub>N: 439.8280; found: 439.8286. IR (neat, cm<sup>-1</sup>): 3421, 3021, 2995, 1594, 1590, 1502, 1354, 1276, 1158, 1076, 863, 754, 697, 617, 569, 531.

### 6,8-dibromo-4-phenyl-1,2,3,4-tetrahydroquinoline, **2a'**

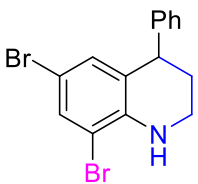 Yellow oil, 59.1 mg, 81%. <sup>1</sup>H NMR (400 MHz, CDCl<sub>3</sub>) δ = 7.46 (s, 1H), 7.35 (t, *J* = 7.2 Hz, 2H), 7.28 (d, *J* = 7.8 Hz, 1H), 7.12 (d, *J* = 8.0 Hz, 2H), 6.88 (s, 1H), 4.15 (t, *J* = 8.0 Hz, 1H), 3.43 – 3.29 (m, 2H), 2.22 – 2.15 (m, 1H), 2.10 – 2.04 (m, 1H). <sup>13</sup>C NMR (100 MHz, CDCl<sub>3</sub>) δ = 145.1, 141.0, 132.5, 131.9, 128.5, 128.4, 126.6, 126.1, 108.8, 107.2, 43.0, 38.9, 30.0. HRMS (ESI): *m/z* [M+H]<sup>+</sup> calcd for C<sub>15</sub>H<sub>14</sub>Br<sub>2</sub>N: 365.9488; found: 365.9490. IR (neat, cm<sup>-1</sup>): 3421, 3021, 2995, 1594, 1590, 1502, 1354, 1276, 1158, 1076, 863, 754, 697, 617, 569, 531.

### 6,8-dichloro-4-phenyl-1,2,3,4-tetrahydroquinoline, **3a'** [3]

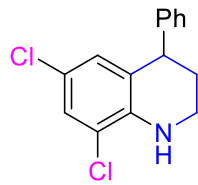
 Yellow oil, 12.2 mg, 22 %. <sup>1</sup>H NMR (400 MHz, DMSO)  $\delta$  = 7.32 (t,  $J$  = 7.3 Hz, 2H), 7.22 (m, 2H), 7.08 (d,  $J$  = 7.2 Hz, 2H), 6.57 (s, 1H), 5.93 (s, 1H), 4.18-4.15 (m, 1H), 3.33-3.31 (m, 1H), 3.13-3.11 (m, 1H), 2.06 – 1.87 (m, 2H). <sup>13</sup>C NMR (100 MHz, DMSO)  $\delta$  = 145.6, 140.8, 128.9, 128.7, 128.2, 126.9, 126.8, 126.0, 118.0, 117.5, 42.4, 38.4, 29.2. HRMS (ESI):  $m/z$  [M+H]<sup>+</sup> calcd for C<sub>15</sub>H<sub>14</sub>Cl<sub>2</sub>N: 278.0498; found: 278.0499. IR (neat, cm<sup>-1</sup>): 3425, 3059, 3024, 2950, 2926, 1599, 1502, 1450, 1367, 1278, 1169, 1105, 1058, 1029, 860, 832, 732, 757, 700, 640, 582, 532.

3,8-dibromo-6-chloro-4-phenylquinoline, **2b** <sup>[2]</sup>

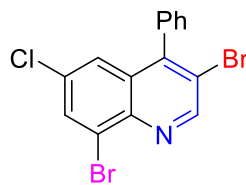
 Yellow solid, 64.0 mg, 81%, m.p. 170–171 °C. <sup>1</sup>H NMR (400 MHz, CDCl<sub>3</sub>)  $\delta$  = 9.13 (s, 1H), 8.03 (s, 1H), 7.57 (s, 3H), 7.43 (s, 1H), 7.29 – 7.26 (m, 2H). <sup>13</sup>C NMR (100 MHz, CDCl<sub>3</sub>)  $\delta$  = 152.8, 147.4, 142.7, 135.8, 133.6, 133.3, 130.2, 129.2, 129.1, 128.9, 126.1, 125.1, 120.8. HRMS (ESI):  $m/z$  [M+H]<sup>+</sup> calcd for C<sub>15</sub>H<sub>9</sub>Br<sub>2</sub>ClN: 395.8785; found: 395.8787. IR (neat, cm<sup>-1</sup>): 3638, 3044, 2920, 1889, 1595, 1461, 1443, 1352, 1115, 1093, 1073, 1034, 987, 855, 768, 624, 571, 532.

3,8-dibromo-6-fluoro-4-phenylquinoline, **2c**

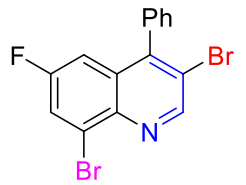
 White solid, 65.9 mg, 87%, m.p. 109-111 °C. <sup>1</sup>H NMR (400 MHz, CDCl<sub>3</sub>)  $\delta$  = 9.11 (s, 1H), 7.86 – 7.84 (m, 1H), 7.57 – 7.56 (m, 3H), 7.29 – 7.26 (m, 2H), 7.11 – 7.08 (m, 1H). <sup>13</sup>C NMR (100 MHz, CDCl<sub>3</sub>)  $\delta$  = 160.0 (d, <sup>1</sup> $J$  = 251.0 Hz), 152.5 (d, <sup>4</sup> $J$  = 2.0 Hz), 147.7 (d, <sup>4</sup> $J$  = 6.0 Hz), 141.5, 136.0, 130.2 (d, <sup>3</sup> $J$  = 10.0 Hz), 129.1, 129.0, 128.9, 126.6 (d, <sup>3</sup> $J$  = 10.0 Hz), 123.6 (d, <sup>2</sup> $J$  = 28.0 Hz), 120.7, 110.0 (d, <sup>2</sup> $J$  = 23.0 Hz). <sup>19</sup>F NMR (376 MHz, CDCl<sub>3</sub>)  $\delta$  -109.7. HRMS (ESI):  $m/z$  [M+H]<sup>+</sup> calcd for C<sub>15</sub>H<sub>9</sub>Br<sub>2</sub>FN: 379.9080; found: 379.9078. IR (neat, cm<sup>-1</sup>): 3675, 3059, 2924, 2853, 1739, 1611, 1549, 1477, 1361, 1195, 1156, 1033, 947, 916, 862, 784, 762, 703, 630, 560.

3,8-dibromo-6-methyl-4-phenylquinoline, **2d** <sup>[2]</sup>

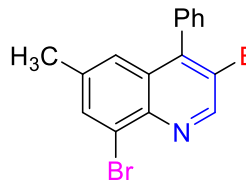
 Yellow solid, 45.0 mg, 60%, m.p. 113-115 °C. <sup>1</sup>H NMR (400 MHz, CDCl<sub>3</sub>)  $\delta$  = 9.07 (s, 1H), 7.88 (s, 1H), 7.56 – 7.54 (m, 3H), 7.27 (d,  $J$  = 6.4 Hz 2H), 7.19 (s, 1H), 2.38 (s, 3H). <sup>13</sup>C NMR (100 MHz, CDCl<sub>3</sub>)  $\delta$  = 151.6, 147.3, 142.4, 138.2, 136.5, 135.2, 129.9, 129.1, 128.7, 128.6, 125.1, 124.5, 119.7, 21.4. HRMS (ESI):  $m/z$  [M+H]<sup>+</sup> calcd for C<sub>16</sub>H<sub>12</sub>Br<sub>2</sub>N: 375.9331; found: 375.9330. IR (neat, cm<sup>-1</sup>): 3430, 3048, 2910, 1610, 1559, 1473, 1358, 1266, 1157, 1113 1036, 931, 855, 764, 734, 700, 627, 572.

3,8-dibromo-6-butyl-4-phenylquinoline, **2e**

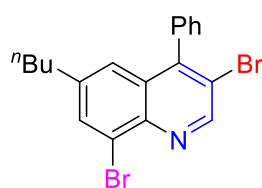

White solid, 55.7 mg, 68%, m.p. 124-125 °C.  $^1\text{H}$  NMR (400 MHz,  $\text{CDCl}_3$ )  $\delta$  = 9.09 (s, 1H), 7.92 (s, 1H), 7.57 – 7.55 (m, 3H), 7.30 – 7.28 (m, 2H), 7.18 (s, 1H), 2.62 (t,  $J$  = 8.0 Hz, 2H), 1.55 – 1.52 (m, 2H), 1.33 – 1.27 (m, 2H), 0.88 (t,  $J$  = 8.0 Hz, 3H).  $^{13}\text{C}$  NMR (100 MHz,  $\text{CDCl}_3$ )  $\delta$  = 151.8, 147.6, 143.3, 142.8, 136.8, 134.6, 130.1, 129.3, 128.8, 128.7, 124.8, 124.7, 119.8, 35.5, 33.2, 22.2, 13.8. HRMS (ESI):  $m/z$   $[\text{M}+\text{H}]^+$  calcd for  $\text{C}_{19}\text{H}_{18}\text{Br}_2\text{N}$ : 417.9801; found: 417.9805. IR (neat,  $\text{cm}^{-1}$ ): 3356, 3053, 2930, 2868, 1606, 1473, 1367, 1111, 1031, 945, 929, 868, 818, 745, 703, 576.

### 3,8-dibromo-6-(tert-butyl)-4-phenylquinoline, **2f**

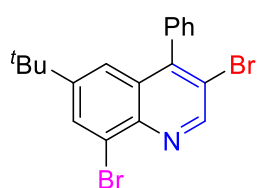

White solid, 56.7 mg, 69%, m.p. 138-139 °C.  $^1\text{H}$  NMR (400 MHz,  $\text{CDCl}_3$ )  $\delta$  = 9.10 (s, 1H), 8.12 (s, 1H), 7.56 – 7.54 (m, 3H), 7.37 (s, 1H), 7.32 – 7.29 (m, 2H), 1.25 (s, 9H).  $^{13}\text{C}$  NMR (100 MHz,  $\text{CDCl}_3$ )  $\delta$  = 152.0, 151.3, 148.0, 142.5, 136.6, 132.2, 129.7, 129.2, 128.8, 128.6, 124.6, 121.5, 119.6, 35.1, 30.9. HRMS (ESI):  $m/z$   $[\text{M}+\text{H}]^+$  calcd for  $\text{C}_{19}\text{H}_{18}\text{Br}_2\text{N}$ : 417.9801; found: 417.9799. IR (neat,  $\text{cm}^{-1}$ ): 3660, 3035, 2962, 1883, 1603, 1543, 1468, 1370, 1256, 1199, 1029, 986, 815, 757, 697, 622, 575.

### 3,8-dibromo-6-methoxy-4-phenylquinoline, **2g**

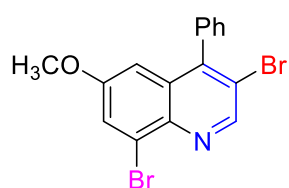

White solid, 46.9 mg, 60%, m.p. 136-137 °C.  $^1\text{H}$  NMR (400 MHz,  $\text{CDCl}_3$ )  $\delta$  = 8.99 (s, 1H), 7.72 (d,  $J$  = 1.9 Hz, 1H), 7.57-7.50 (m, 3H), 7.29 (d,  $J$  = 6.8 Hz, 2H), 6.69 (s, 1H), 3.68 (s, 3H).  $^{13}\text{C}$  NMR (100 MHz,  $\text{CDCl}_3$ )  $\delta$  = 158.0, 150.1, 146.7, 140.2, 136.8, 130.6, 129.1, 128.8, 128.8, 125.9, 125.3, 120.2, 104.8, 55.6. HRMS (ESI):  $m/z$   $[\text{M}+\text{H}]^+$  calcd for  $\text{C}_{16}\text{H}_{12}\text{Br}_2\text{NO}$ : 391.9280; found: 391.9281. IR (neat,  $\text{cm}^{-1}$ ): 3670, 3050, 2971, 1608, 1474, 1403, 1232, 1167, 1104, 1041, 871, 842, 764, 703, 636, 571, 521.

### 3,8-dibromo-4-phenyl-6-(trifluoromethoxy)quinoline, **2h**

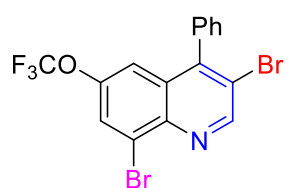

White solid, 71.2 mg, 80%, m.p. 98-99 °C.  $^1\text{H}$  NMR (400 MHz,  $\text{CDCl}_3$ )  $\delta$  = 9.17 (s, 1H), 7.95 (s, 1H), 7.59 – 7.56 (m, 3H), 7.30 – 7.26 (m, 3H).  $^{13}\text{C}$  NMR (100 MHz,  $\text{CDCl}_3$ )  $\delta$  = 153.2, 148.2, 147.0, 142.7, 135.7, 129.9, 129.3, 129.1, 128.9, 127.1, 126.7, 121.6, 120.9, 119.1, 116.8.  $^{19}\text{F}$  NMR (376 MHz,  $\text{CDCl}_3$ )  $\delta$  = 57.9. HRMS (ESI):  $m/z$   $[\text{M}+\text{H}]^+$  calcd for  $\text{C}_{16}\text{H}_9\text{Br}_2\text{F}_3\text{NO}$ : 445.8998; found: 445.9000. IR (neat,  $\text{cm}^{-1}$ ): 3398, 3053, 2974, 2882, 1613, 1551, 1478, 1441, 1399, 1260, 1198, 1171, 1049, 966, 879, 751, 703, 576, 558.

### 3,6,8-tribromo-4-(4-fluorophenyl)quinoline, **2i**

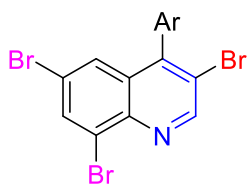

White solid, 81.3 mg, 89%, m.p. 159-161 °C.  $^1\text{H}$  NMR (400 MHz, DMSO- $d_6$ )  $\delta$  = 9.25 (s, 1H), 8.42 (s, 1H), 7.48 – 7.46 (m, 5H).  $^{13}\text{C}$  NMR (100 MHz, DMSO- $d_6$ )  $\delta$  = 162.6 (d,  $^1J$  = 245.0 Hz), 153.2, 146.2, 142.3, 135.7, 131.8 (d,  $^4J$  = 4.0 Hz), 131.7 (d,  $^3J$  = 9.0 Hz), 130.4, 128.0, 126.3, 121.0, 121.0, 116.2 (d,  $^2J$  = 22.0 Hz).  $^{19}\text{F}$  NMR (376 MHz,  $\text{CDCl}_3$ )  $\delta$  -111.9. HRMS (ESI):  $m/z$   $[\text{M}+\text{H}]^+$  calcd for  $\text{C}_{15}\text{H}_8\text{Br}_3\text{FN}$ : 457.8185; found: 457.8181. IR (neat,  $\text{cm}^{-1}$ ): 3429, 3069, 2925, 1696, 1604, 1583, 1508, 1349, 1241, 1227, 1018, 988, 866, 836, 793, 740, 653, 578, 551.

#### 6,8-dibromo-3-pentyl-4-phenylquinoline, **2j**

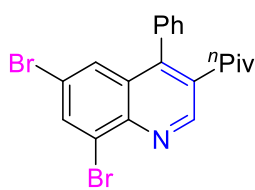

Yellow solid, 71.5 mg, 83%, m.p. 80-81 °C.  $^1\text{H}$  NMR (400 MHz,  $\text{CDCl}_3$ )  $\delta$  = 8.96 (s, 1H), 8.07 (d,  $J$  = 4.0 Hz, 1H), 7.53 – 7.49 (m, 4H), 7.23 – 7.20 (m, 2H), 2.58 – 2.54 (m, 2H), 1.51 – 1.47 (m, 2H), 1.19 – 1.15 (m, 5H), 0.80 – 0.77 (m, 3H).  $^{13}\text{C}$  NMR (100 MHz,  $\text{CDCl}_3$ )  $\delta$  = 153.3, 145.7, 142.7, 135.5, 134.9, 134.7, 130.0, 129.3, 128.7, 128.5, 128.3, 126.0, 119.9, 31.4, 31.0, 30.7, 22.2, 13.8. HRMS (ESI):  $m/z$   $[\text{M}+\text{H}]^+$  calcd for  $\text{C}_{20}\text{H}_{20}\text{Br}_2\text{N}$ : 431.9957; found: 431.9959. IR (neat,  $\text{cm}^{-1}$ ): 3431, 3058, 2954, 2925, 2841, 1585, 1470, 1395, 1349, 1156, 1071, 996, 962, 863, 765, 702, 665, 578, 522.

#### 6,8-dibromo-3-methyl-4-phenylquinoline, **2k**

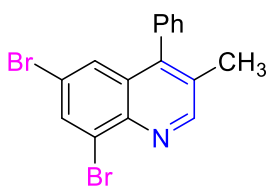

Yellow solid, 46.5 mg, 62%, m.p. 147-149 °C.  $^1\text{H}$  NMR (400 MHz,  $\text{CDCl}_3$ )  $\delta$  = 8.95 (s, 1H), 8.07 (s, 1H), 7.55 – 7.51 (m, 4H), 7.23 – 7.21 (m, 2H), 2.27 (s, 3H).  $^{13}\text{C}$  NMR (100 MHz,  $\text{CDCl}_3$ )  $\delta$  = 153.6, 146.1, 142.8, 135.8, 134.7, 130.3, 129.7, 129.1, 128.9, 128.5, 128.1, 126.0, 119.9, 17.7. HRMS (ESI):  $m/z$   $[\text{M}+\text{H}]^+$  calcd for  $\text{C}_{16}\text{H}_{12}\text{Br}_2\text{N}$ : 375.9331; found: 375.9330. IR (neat,  $\text{cm}^{-1}$ ): 3664, 3073, 2972, 1582, 1470, 1440, 1349, 1291, 1152, 1089, 953, 866, 832, 704, 665, 523.

#### 8-bromo-3,6-dimethyl-4-phenylquinoline, **2l**

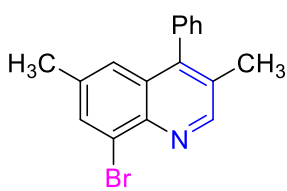

White solid, 33.6 mg, 54%, m.p. 132-133 °C.  $^1\text{H}$  NMR (400 MHz,  $\text{CDCl}_3$ )  $\delta$  = 8.90 (s, 1H), 7.84 (d,  $J$  = 4.0 Hz, 1H), 7.56 – 7.49 (m, 3H), 7.24 – 7.22 (m, 2H), 7.14 (s, 1H), 2.37 (s, 3H), 2.25 (s, 3H).  $^{13}\text{C}$  NMR (100 MHz,  $\text{CDCl}_3$ )  $\delta$  = 152.4, 146.2, 142.5, 136.9, 136.7, 134.0, 129.1, 128.8, 128.7, 128.0, 124.8, 124.4, 21.4, 17.6. HRMS (ESI):  $m/z$   $[\text{M}+\text{H}]^+$  calcd for  $\text{C}_{17}\text{H}_{15}\text{BrN}$ : 312.0382; found: 312.0385. IR (neat,  $\text{cm}^{-1}$ ): 3367, 3055, 2917, 2849, 1673, 1610, 1479, 1441, 1359, 1293, 1179, 1135, 1075, 1026, 934, 864, 787, 766, 631, 527.

#### 8-bromo-6-chloro-3-methyl-4-phenylquinoline, **2m**

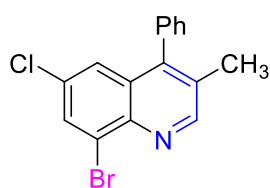

Yellow solid, 41.7 mg, 63%, m.p. 112-114 °C. <sup>1</sup>H NMR (400 MHz, DMSO-*d*<sub>6</sub>) δ = 9.00 (s, 1H), 8.17 (s, 1H), 7.62 – 7.53 (m, 3H), 7.34 – 7.31 (m, 2H), 7.25 (s, 1H), 2.23 (s, 3H). <sup>13</sup>C NMR (100 MHz, DMSO-*d*<sub>6</sub>) δ = 154.0, 145.6, 141.9, 135.2, 131.9, 131.1, 130.6, 129.2, 129.1, 128.7, 128.6, 126.1, 124.2, 17.4.

HRMS (ESI): *m/z* [M+H]<sup>+</sup> calcd for C<sub>16</sub>H<sub>12</sub>BrClN: 331.9836; found: 331.9834. IR (neat, cm<sup>-1</sup>): 3434, 3014, 2824, 1627, 1530, 1474, 1354, 1025, 769, 703, 624, 584, 526.

### 3,6-dibromo-8-methyl-4-phenylquinoline, **2n**

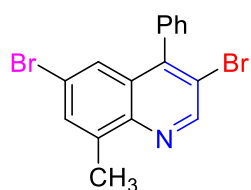

White solid, 60.0 mg, 80%, m.p. 110-112 °C. <sup>1</sup>H NMR (400 MHz, CDCl<sub>3</sub>) δ = 9.05 (s, 1H), 7.66 (s, 1H), 7.56 – 7.53 (m, 3H), 7.46 (d, *J* = 4.0 Hz, 1H), 7.29 – 7.27 (m, 2H), 2.81 (s, 3H). <sup>13</sup>C NMR (100 MHz, CDCl<sub>3</sub>) δ = 151.1, 146.9, 144.8, 140.0, 136.6, 132.9, 130.0, 129.3, 128.9, 128.7, 126.4, 121.6, 119.6, 18.0.

HRMS (ESI): *m/z* [M+H]<sup>+</sup> calcd for C<sub>16</sub>H<sub>12</sub>Br<sub>2</sub>N: 375.9331; found: 375.9333. IR (neat, cm<sup>-1</sup>): 3674, 3053, 2960, 2920, 1589, 1478, 1440, 1374, 1360, 1240, 1194, 1144, 1093, 1073, 913, 860, 797, 763, 709, 619, 571, 531.

### 3,6-dibromo-8-methoxy-4-phenylquinoline, **2o**

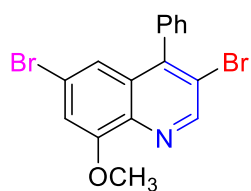

White solid, 54.7 mg, 70%, m.p. 133-134 °C. <sup>1</sup>H NMR (400 MHz, CDCl<sub>3</sub>) δ = 9.03 (s, 1H), 7.56 – 7.55 (m, 3H), 7.29 – 7.27 (m, 2H), 7.18 (d, *J* = 4.0 Hz, 1H), 7.15 (d, *J* = 4.0 Hz, 1H), 4.10 (s, 3H). <sup>13</sup>C NMR (100 MHz, CDCl<sub>3</sub>) δ = 156.2, 150.9, 146.8, 137.8, 136.4, 130.7, 129.2, 128.9, 128.8, 121.9, 120.6, 120.2, 112.0, 56.6.

HRMS (ESI): *m/z* [M+H]<sup>+</sup> calcd for C<sub>16</sub>H<sub>12</sub>Br<sub>2</sub>NO: 391.9280; found: 391.9278. IR (neat, cm<sup>-1</sup>): 3145, 3045, 1589, 1547, 1452, 1420, 1388, 1269, 1152, 1081, 1001, 906, 841, 765, 699, 612, 589, 529.

### 3-bromo-6,8-dimethyl-4-phenylquinoline, **2p**

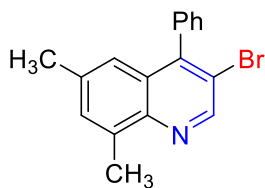

White solid, 32.3 mg, 52%, m.p. 76-78 °C. <sup>1</sup>H NMR (400 MHz, CDCl<sub>3</sub>) δ = 8.99 (s, 1H), 7.55 – 7.51 (m, 3H), 7.41 (s, 1H), 7.30 – 7.28 (m, 2H), 7.06 (s, 1H), 2.80 (s, 3H), 2.36 (s, 3H). <sup>13</sup>C NMR (100 MHz, CDCl<sub>3</sub>) δ = 149.8, 147.0, 144.6, 137.5, 137.3, 137.1, 132.0, 129.3, 129.0, 128.5, 128.4, 123.2, 118.7, 21.8, 18.2.

HRMS (ESI): *m/z* [M+H]<sup>+</sup> calcd for C<sub>17</sub>H<sub>15</sub>BrN: 312.0382; found: 312.0384. IR (neat, cm<sup>-1</sup>): 3537, 3047, 2924, 2851, 1677, 1618, 1575, 1552, 1484, 1386, 1217, 1071, 908, 852, 798, 764, 702, 647, 577, 530.

### 3,6,8-tribromoquinoline, **2q**<sup>[4]</sup>



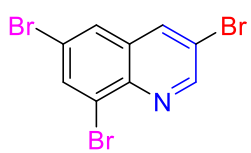

Yellow solid, 56.6 mg, 78%, m.p. 141-143 °C. <sup>1</sup>H NMR (400 MHz, DMSO-*d*<sub>6</sub>)  $\delta$  = 9.09 (d, *J* = 4.0 Hz, 1H), 8.78 (d, *J* = 4.0 Hz, 1H), 8.37 (d, *J* = 4.0 Hz, 1H), 8.31 (d, *J* = 4.0 Hz, 1H). <sup>13</sup>C NMR (100 MHz, DMSO-*d*<sub>6</sub>)  $\delta$  = 153.0, 142.1, 137.8, 136.2, 131.2, 130.0, 125.8, 120.8, 119.4. HRMS (ESI): *m/z* [M+H]<sup>+</sup> calcd for C<sub>9</sub>H<sub>5</sub>BrN: 363.7967; found: 363.7968. IR (neat, cm<sup>-1</sup>): 3427, 3051, 2987, 1837, 1589, 1579, 1541, 1458, 1357, 1327, 1232, 1197, 1083, 1072, 968, 895, 816, 681, 595, 527.

#### Methyl 3,8-dibromoquinoline-6-carboxylate, **2r**

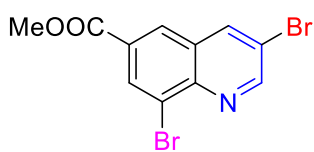

Yellow solid, 34.3 mg, 50%, m.p. 83-84 °C. <sup>1</sup>H NMR (400 MHz, CDCl<sub>3</sub>)  $\delta$  = 9.06 (d, *J* = 2.0 Hz, 1H), 8.60 (d, *J* = 1.6 Hz, 1H), 8.42 (d, *J* = 1.2 Hz, 1H), 8.40 (d, *J* = 2.0 Hz, 1H), 4.01 (s, 3H). <sup>13</sup>C NMR (100 MHz, CDCl<sub>3</sub>)  $\delta$  = 165.0, 154.2, 145.2, 138.8, 132.9, 129.7, 129.5, 129.2, 125.3, 119.1, 52.8. HRMS (ESI): *m/z* [M+H]<sup>+</sup> calcd for C<sub>11</sub>H<sub>8</sub>Br<sub>2</sub>NO<sub>2</sub>: 343.8916; found: 343.8914. IR (neat, cm<sup>-1</sup>): 3419, 3072, 2829, 1726, 1609, 1547, 1464, 1434, 1338, 1256, 1077, 962, 887, 786, 763, 682, 600, 536.

#### 6-bromo-4-phenylquinoline, **2a1**<sup>[5]</sup>

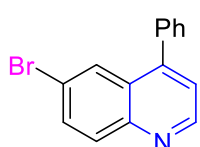

Yellow solid, 15.3 mg (0.6 mmol), 9 %, m.p. 61-63 °C. <sup>1</sup>H NMR (400 MHz, CDCl<sub>3</sub>)  $\delta$  = 8.93 (d, *J* = 4.0 Hz, 1H), 8.05-8.03 (m, 2H), 7.78 (dd, *J* = 8.9, 2.0 Hz, 1H), 7.56-7.46 (m, 2H), 7.33 (d, *J* = 4.3 Hz, 1H). <sup>13</sup>C NMR (100 MHz, CDCl<sub>3</sub>)  $\delta$  = 152.0, 147.7, 147.2, 137.3, 132.8, 131.6, 129.4, 128.8, 128.7, 128.0, 122.0, 120.9. HRMS (ESI): *m/z* [M+H]<sup>+</sup> calcd for C<sub>15</sub>H<sub>11</sub>BrN: 284.0069; found: 284.0067. IR (neat, cm<sup>-1</sup>): 3433, 3055, 2994, 1601, 1555, 1488, 1349, 1263, 1156, 1058, 968, 876, 824, 778, 698, 322, 598, 553.

#### 3,6,8-tribromo-4-phenyl-3,4-dihydroquinolin-2(1H)-one, **2a2**

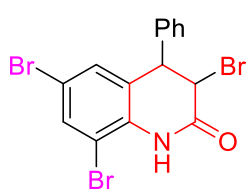

White oil, 32.3 mg (0.6 mmol), 12 %. <sup>1</sup>H NMR (400 MHz, CDCl<sub>3</sub>)  $\delta$  = 7.99 (s, 1H), 7.69 (s, 1H), 7.33 – 7.32 (m, 1H), 7.30 – 7.25 (m, 3H), 7.02 – 7.00 (m, 2H), 4.65 – 4.64 (m, 1H), 4.52-4.51 (m, 1H). <sup>13</sup>C NMR (100 MHz, CDCl<sub>3</sub>)  $\delta$  = 164.4, 134.2, 133.3, 132.0, 129.5, 128.6, 126.2, 116.4, 110.4, 52.1, 44.6. HRMS (ESI): *m/z* [M+H]<sup>+</sup> calcd for C<sub>15</sub>H<sub>11</sub>Br<sub>3</sub>NO: 457.8385; found: 457.8388. IR (neat, cm<sup>-1</sup>): 3432, 3077, 2883, 2820, 1692, 1474, 1349, 1049, 904, 729, 695, 510, 597, 547.

#### 8-bromo-6-chloro-4-phenyl-3,4-dihydroquinolin-2(1H)-one, **2b1**

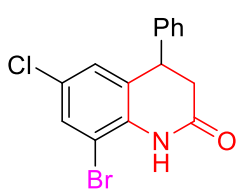

Pale yellow solid, 3.3 mg, 5%, m.p. 138-140 °C. <sup>1</sup>H NMR (400 MHz, CDCl<sub>3</sub>)  $\delta$  = 7.91 (s, 1H), 7.45 (s, 1H), 7.39 – 7.30 (m, 3H), 7.17 (d, *J* = 8.0 Hz, 2H), 6.85 (s, 1H), 4.28 (t, *J* = 8.0 Hz, 1H), 2.92 (d, *J* = 8.0 Hz, 2H). <sup>13</sup>C NMR (100 MHz, CDCl<sub>3</sub>)  $\delta$  = 169.0, 139.7, 133.8, 130.8, 129.9, 129.2, 128.4, 127.8, 127.7, 127.6, 109.9, 42.5, 37.8. HRMS (ESI): *m/z* [M+H]<sup>+</sup> calcd for C<sub>15</sub>H<sub>12</sub>BrClNO: 335.9785; found:

335.9786. IR (neat,  $\text{cm}^{-1}$ ): 3382, 3072, 2982, 1689, 1595, 1467, 1338, 1163, 1089, 863, 759, 703, 671, 553, 502.

3,8-dibromo-6-chloro-4-phenyl-3,4-dihydroquinolin-2(1H)-one, **2b2**

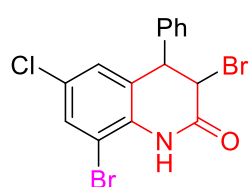

Yellow solid, 6.6 mg, 8%, m.p. 125-127 °C.  $^1\text{H}$  NMR (400 MHz,  $\text{CDCl}_3$ )  $\delta$  = 7.92 (s, 1H), 7.57 (s, 1H), 7.33 – 7.28 (m, 3H), 7.20 (s, 1H), 7.03 – 7.01 (m, 2H), 4.65 – 4.64 (m, 1H), 4.52 (s, 1H).  $^{13}\text{C}$  NMR (100 MHz,  $\text{CDCl}_3$ )  $\delta$  = 164.5, 137.3, 132.8, 131.6, 129.5, 129.4, 129.2, 128.6, 127.2, 125.8, 110.2, 52.2, 44.6.

HRMS (ESI):  $m/z$   $[\text{M}+\text{H}]^+$  calcd for  $\text{C}_{15}\text{H}_{11}\text{Br}_2\text{ClNO}$ : 413.8890; found: 413.8893. IR (neat,  $\text{cm}^{-1}$ ): 3228, 3064, 2925, 1687, 1600, 1570, 1493, 1426, 1354, 1262, 1100, 1081, 946, 866, 761, 697, 581, 565, 525.

3-bromo-8-methyl-4-phenyl-6-(phenylethynyl) quinoline, **3n**

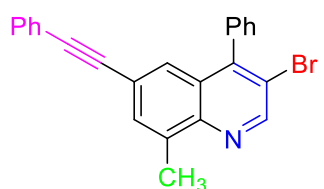

Yellow solid, 619.4 mg, 65%, m.p. 146-148 °C.  $^1\text{H}$  NMR (400 MHz,  $\text{CDCl}_3$ )  $\delta$  = 9.05 (s, 1H), 7.69 (s, 1H), 7.58 – 7.56 (m, 3H), 7.51 (s, 3H), 7.33 (s, 5H), 2.83 (s, 3H).  $^{13}\text{C}$  NMR (100 MHz,  $\text{CDCl}_3$ )  $\delta$  = 151.2, 147.4, 145.6, 137.8, 136.9, 132.2, 131.7, 129.4, 128.8, 128.7, 128.6, 128.4,

127.6, 122.8, 122.2, 119.4, 90.8, 89.2, 18.1. HRMS (EI):  $m/z$   $[\text{M}+\text{H}]^+$  calcd for  $\text{C}_{24}\text{H}_{17}\text{BrN}$ : 398.0539; found: 398.0542. IR (neat,  $\text{cm}^{-1}$ ): 3074, 3046, 2922, 1609, 1550, 1480, 1441, 1418, 1379, 1234, 1145, 910, 870, 799, 756, 705, 691, 598, 522.

8-methyl-4-phenyl-6-(phenylethynyl)-3-(*p*-tolyl)quinoline, **4n**

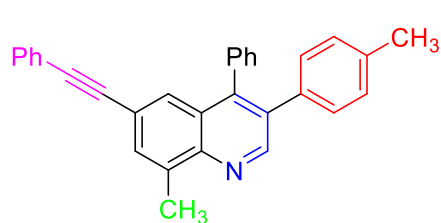

White solid, 36.8 mg, 45%, m.p. 143-144 °C.  $^1\text{H}$  NMR (400 MHz,  $\text{CDCl}_3$ )  $\delta$  = 9.01 (s, 1H), 7.70 (d,  $J$  = 4.0 Hz, 2H), 7.53 – 7.51 (m, 2H), 7.39 – 7.37 (m, 3H), 7.34 – 7.33 (m, 3H), 7.22 – 7.20 (m, 2H), 7.05 (s, 4H), 2.88 (s, 3H), 2.31 (s, 3H).  $^{13}\text{C}$  NMR (100 MHz,  $\text{CDCl}_3$ )  $\delta$  = 151.3, 146.2, 145.3, 137.4,

136.8, 136.5, 135.1, 133.5, 131.8, 131.7, 130.6, 130.0, 128.9, 128.4, 128.4, 128.3, 128.0, 127.7, 127.3, 127.1, 123.1, 121.3, 90.2, 89.7, 21.1, 18.3. HRMS (EI):  $m/z$   $[\text{M}+\text{H}]^+$  calcd for  $\text{C}_{31}\text{H}_{24}\text{N}$ : 410.1903; found: 410.1905. IR (neat,  $\text{cm}^{-1}$ ): 3357, 3186, 3054, 2921, 2851, 1758, 1659, 1632, 1442, 1384, 1262, 1184, 1113., 1022, 925, 877, 826, 754, 701, 606, 557, 532.

[1] V. S. P. R. Lingam, A. Thomas, K. Mukkanti and B. Gopalan, Simple and Convenient Approach for Synthesis of Tetrahydroquinoline Derivatives and Studies on Aza-Cope Rearrangement. *Synthetic Commun.* 2011, **41**, 1809-1828.

[2] S. Deng, W. Ouyang, J. Bai, X.-R. Song, R. Yang and Q. Xiao, Synthesis of Multibromo-Substituted Quinolines by NBS-Mediated Cascade Electrophilic Bromination/Cyclization of N-(3-Phenylprop-2-

ynyl)anilines. *Synthesis*, 2021, **53**, 2469-2476.

[3] B. Kaboudin, M. Sohrabi and F. Kazemi, Synthesis of julolidines *via* one-pot cascade three component Povarov reaction in the presence of silica sulfuric acid. *J. Heterocyclic Chem.* 2021, **58**, 1594-1600

[4] A. Sahin, O. Cakmak, I. Demirtas, S. Okten and A. Tutar, Efficient and selective synthesis of quinoline derivatives. *Tetrahedron* 2008, **64**, 10068-10074.

[5] X. Xu, Y. Yang, X. Zhang and W. Yi, Direct Synthesis of Quinolines *via* Co(III)-Catalyzed and DMSO-Involved C–H Activation/Cyclization of Anilines with Alkynes. *Org. Lett.* 2018, **20**, 566–569.

## 5. NMR Spectra for Compounds

### 3,6,8-tribromo-4-phenylquinoline, 2a

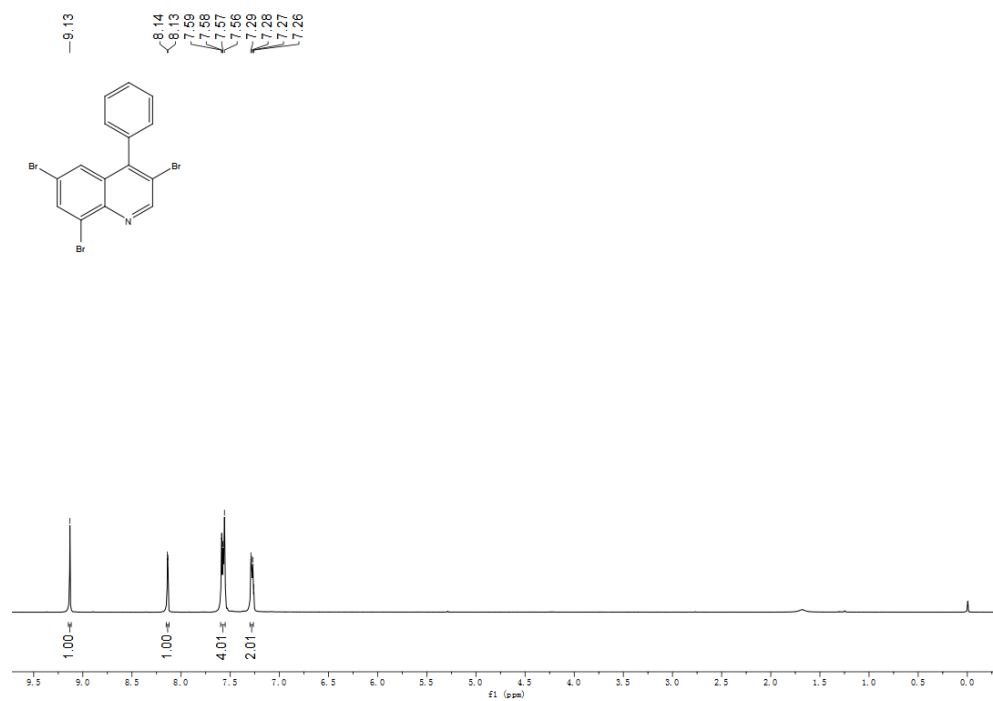

<sup>1</sup>H NMR (25°C, 400 MHz, CDCl<sub>3</sub>)

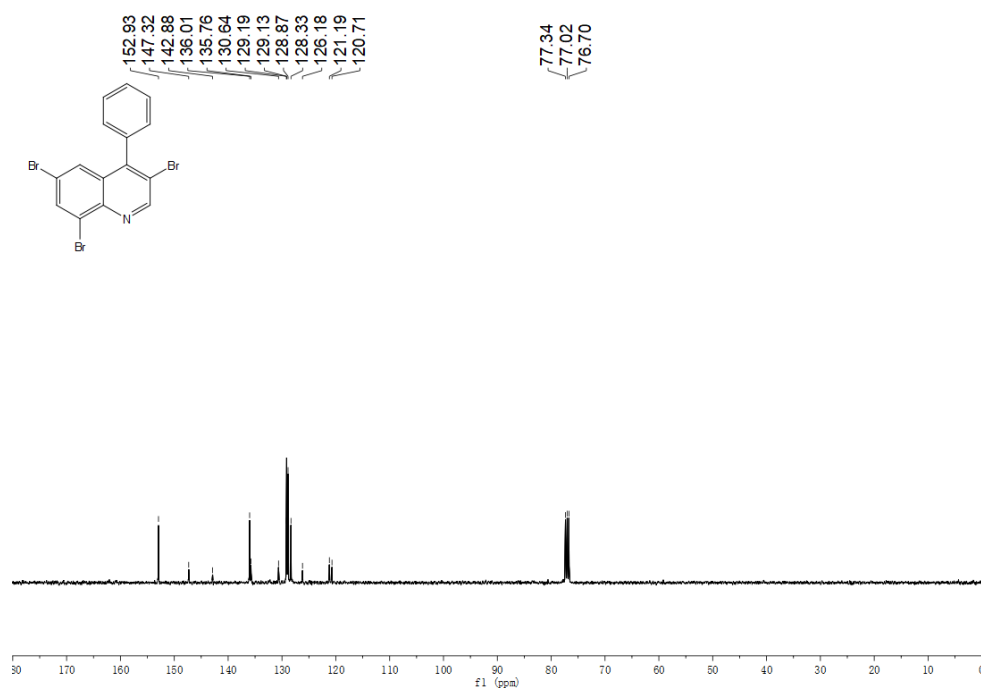

<sup>13</sup>C NMR (25°C, 100 MHz, CDCl<sub>3</sub>)

6,8-dibromo-4-phenyl-1,2,3,4-tetrahydroquinoline, **2a'**

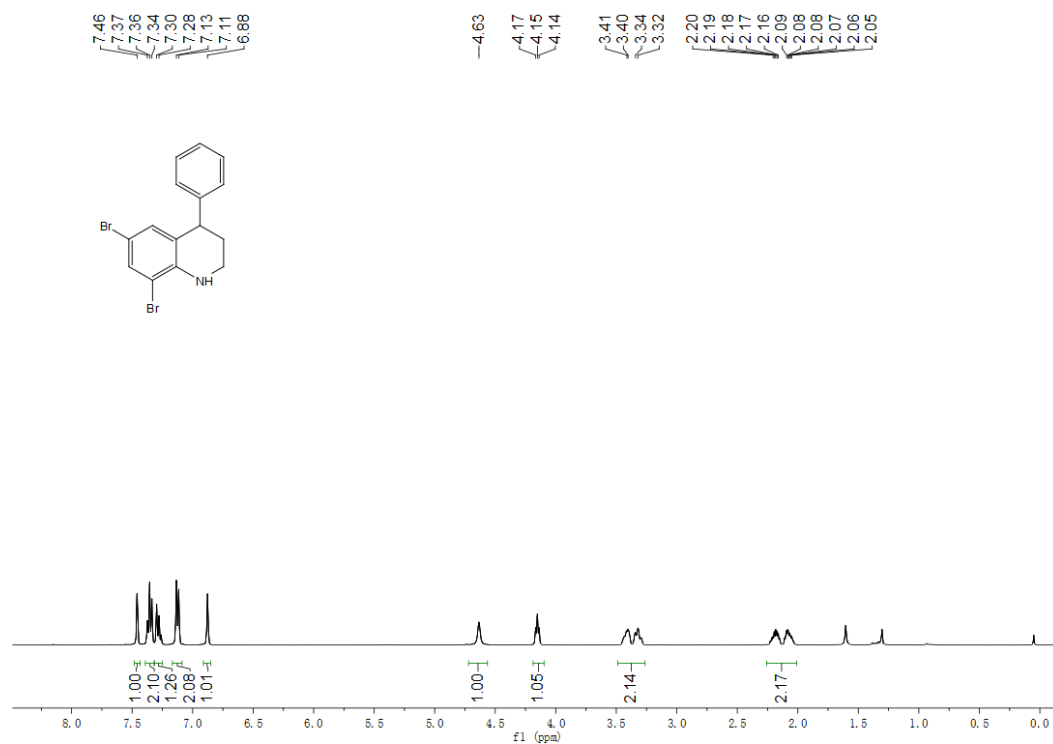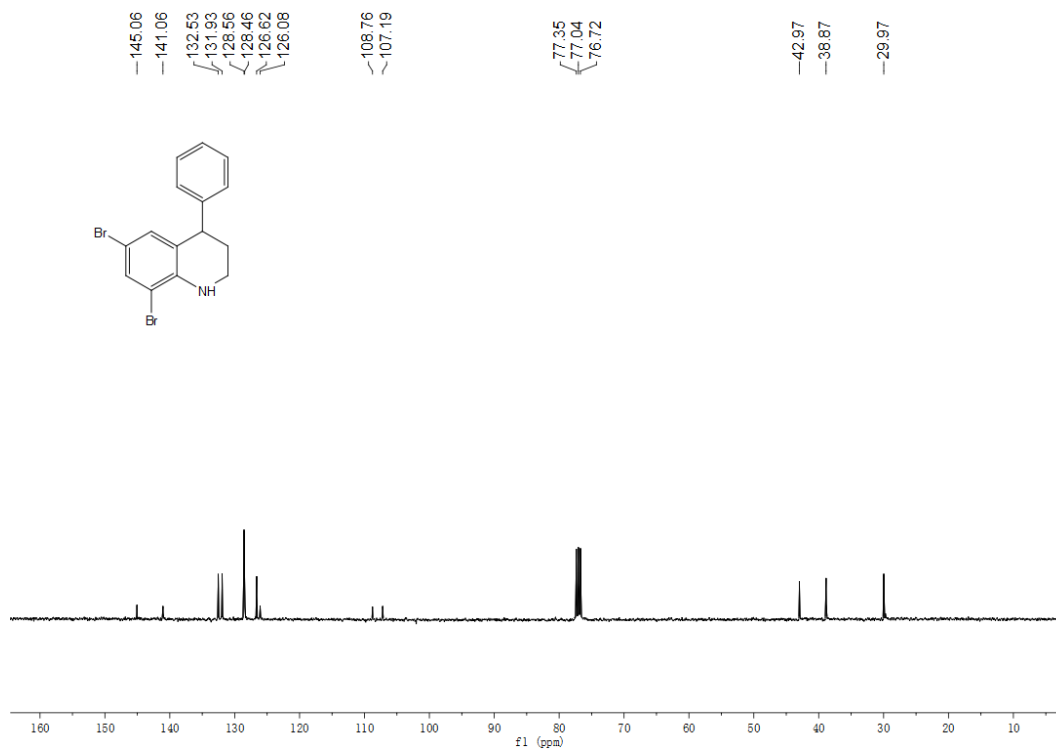

<sup>13</sup>C NMR (25°C, 100 MHz, CDCl<sub>3</sub>)

6,8-dichloro-4-phenyl-1,2,3,4-tetrahydroquinoline, **3a'**

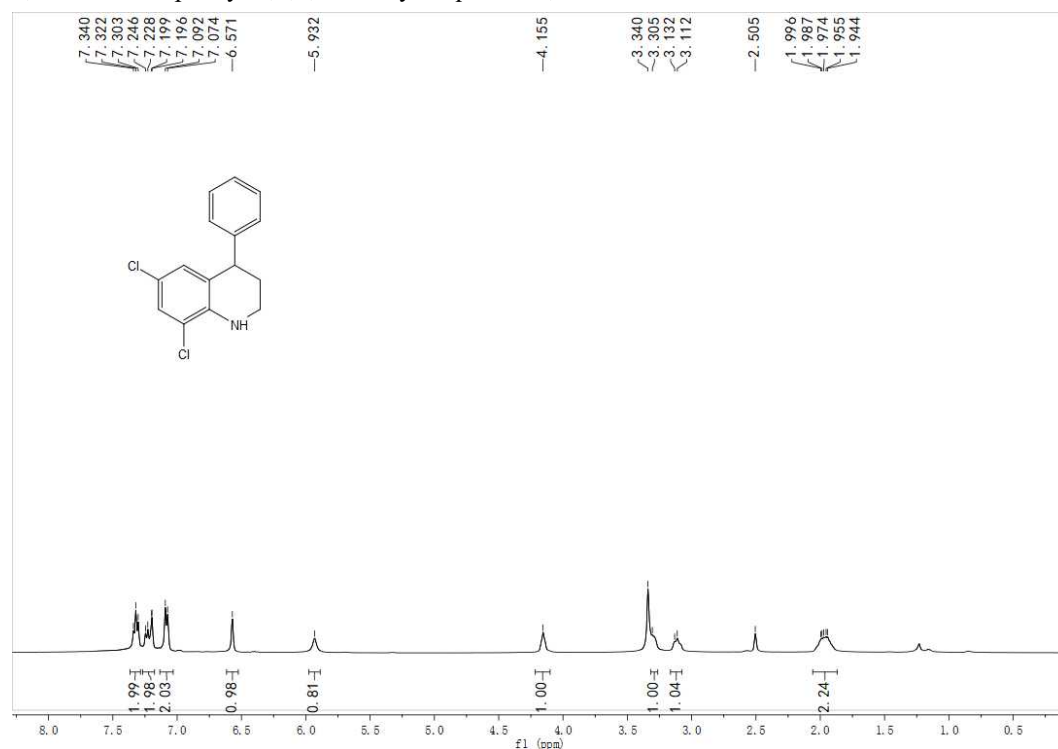

<sup>1</sup>H NMR (25°C, 400 MHz, DMSO)

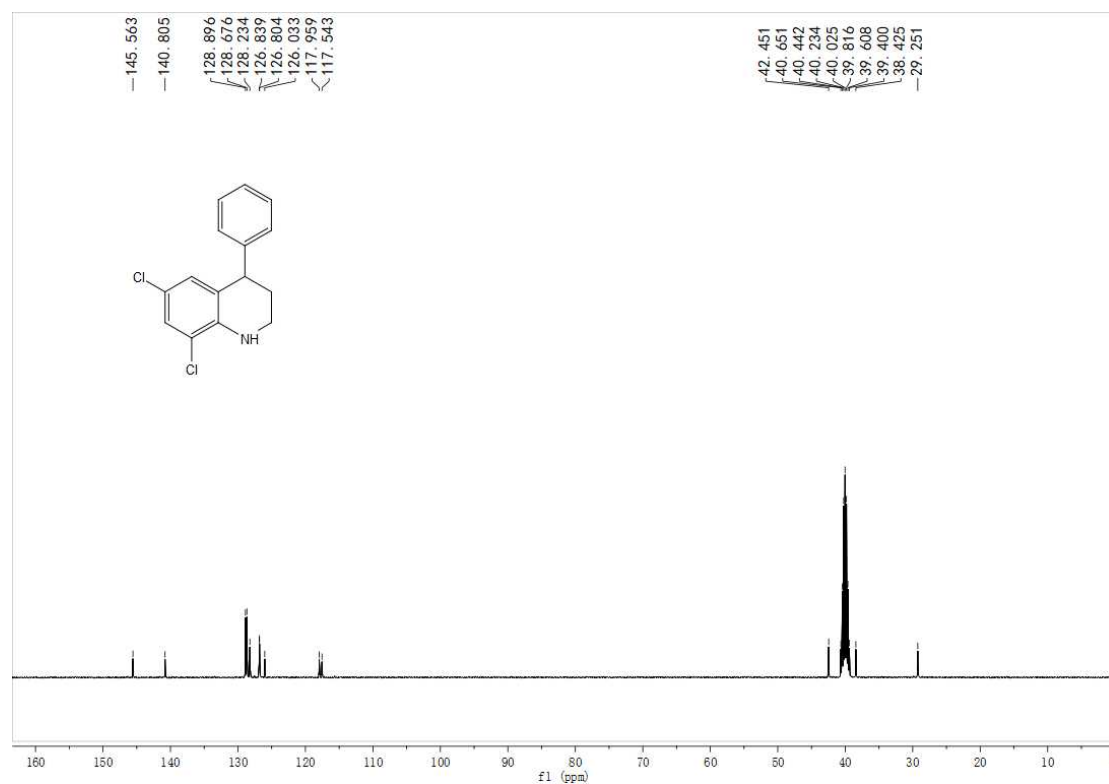

<sup>13</sup>C NMR (25°C, 100 MHz, DMSO)

3,8-dibromo-6-chloro-4-phenylquinoline, **2b**

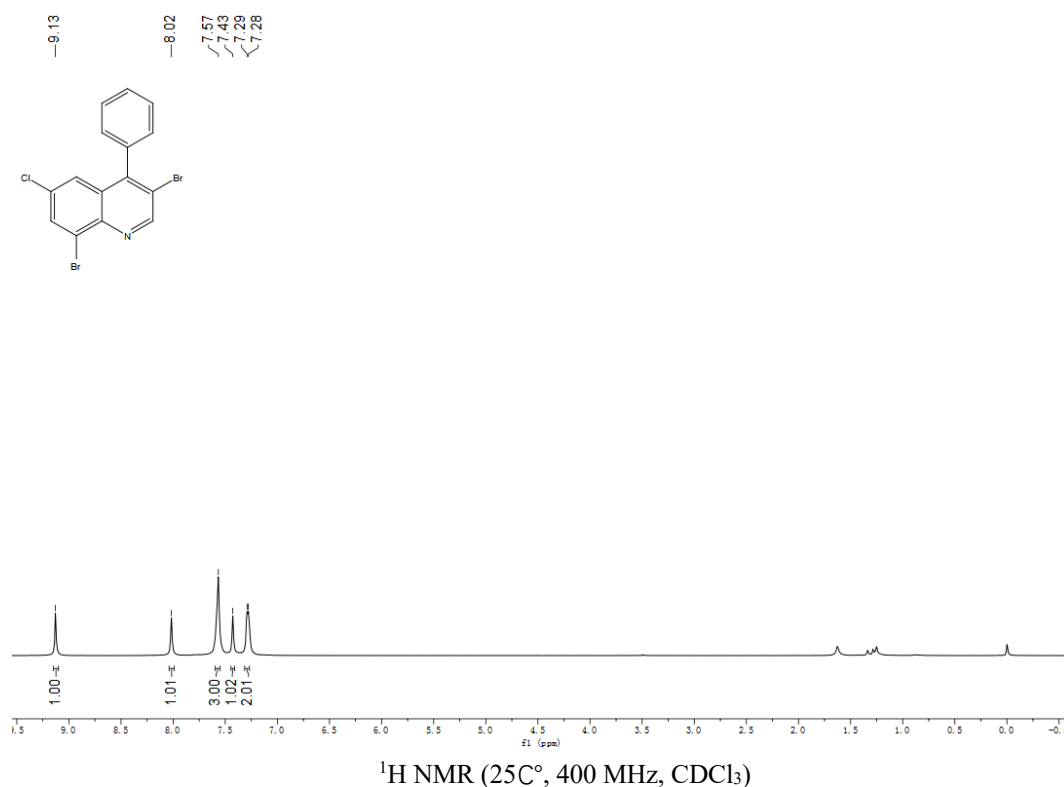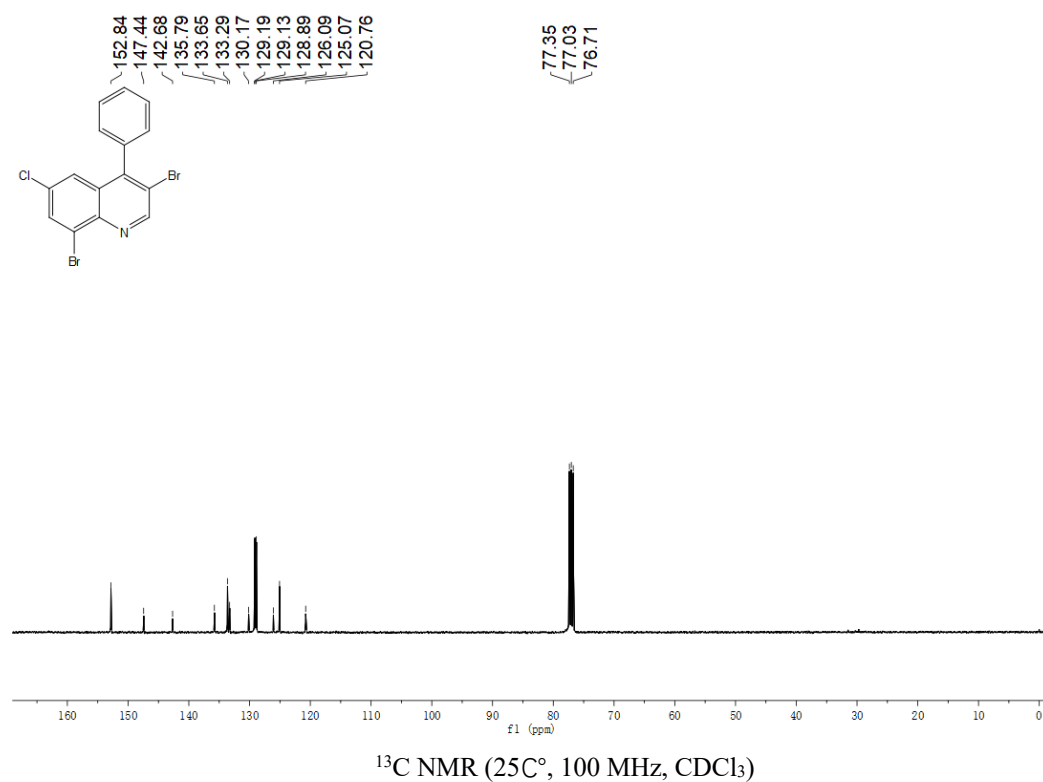

3,8-dibromo-6-fluoro-4-phenylquinoline, **2c**

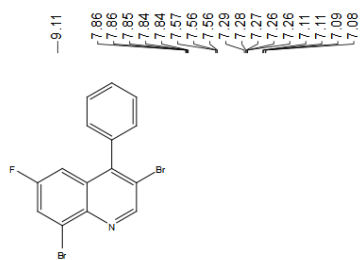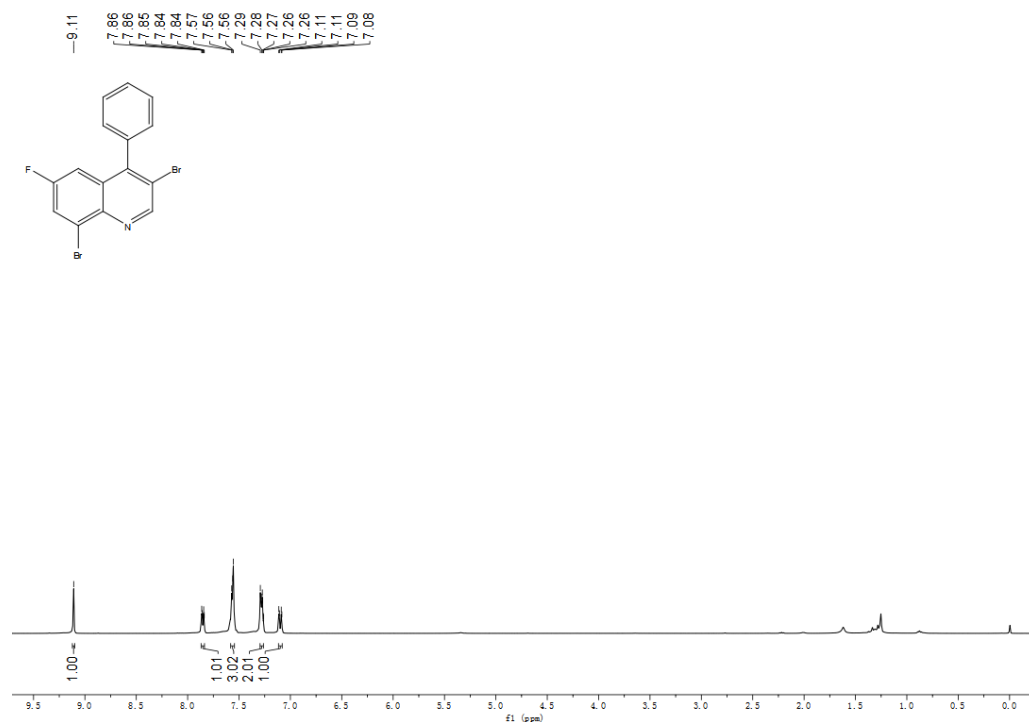

$^1\text{H}$  NMR (25°C, 400 MHz,  $\text{CDCl}_3$ )

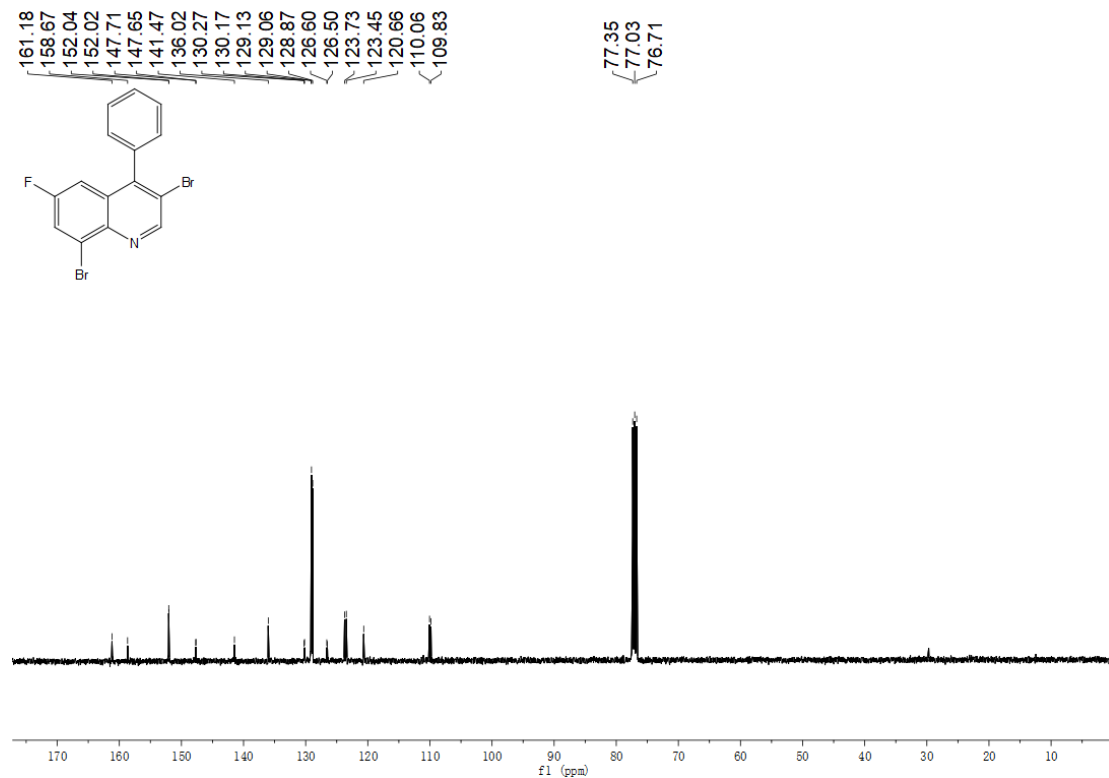

$^{13}\text{C}$  NMR (25°C, 100 MHz,  $\text{CDCl}_3$ )



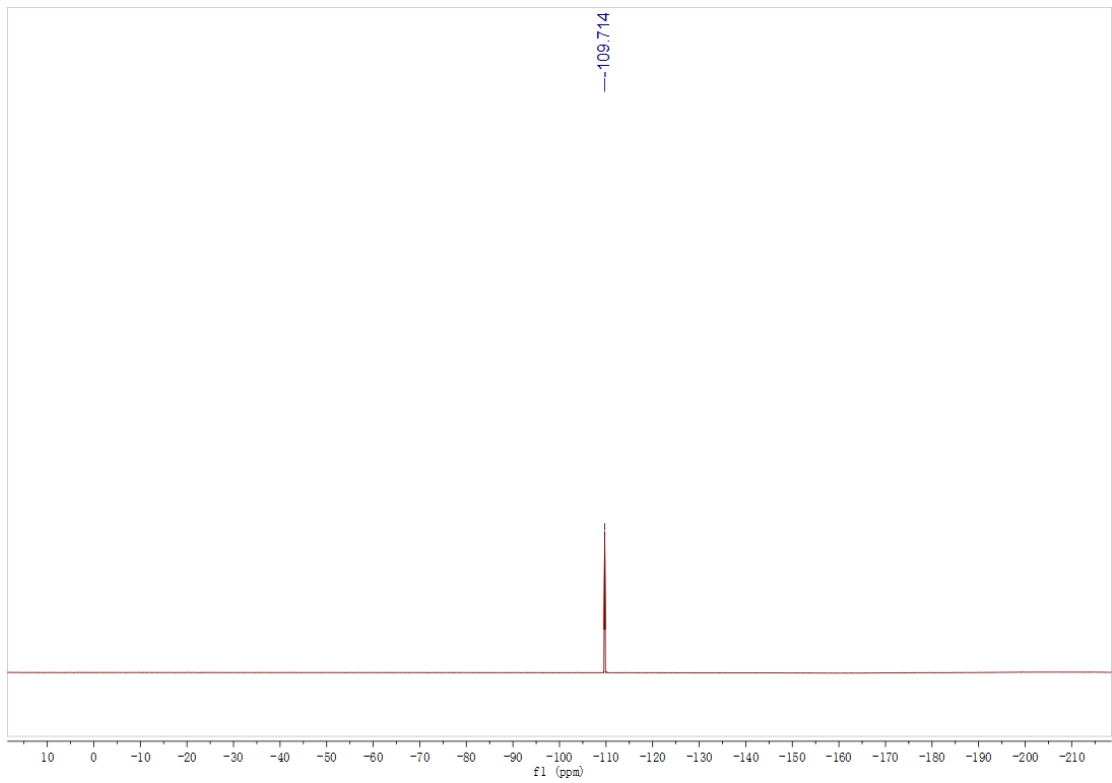

$^{19}\text{F}$  NMR (25°C, 376 MHz,  $\text{CDCl}_3$ )

3,8-dibromo-6-methyl-4-phenylquinoline, **2d**

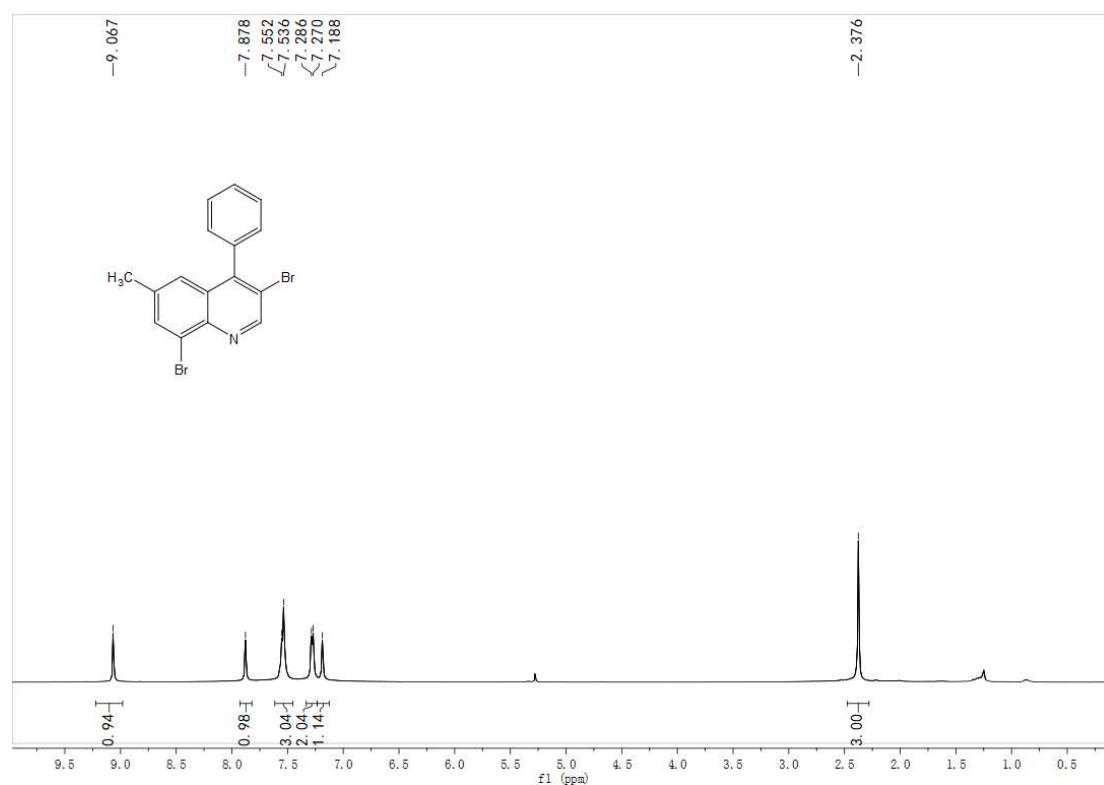

<sup>1</sup>H NMR (25°C, 400 MHz, CDCl<sub>3</sub>)

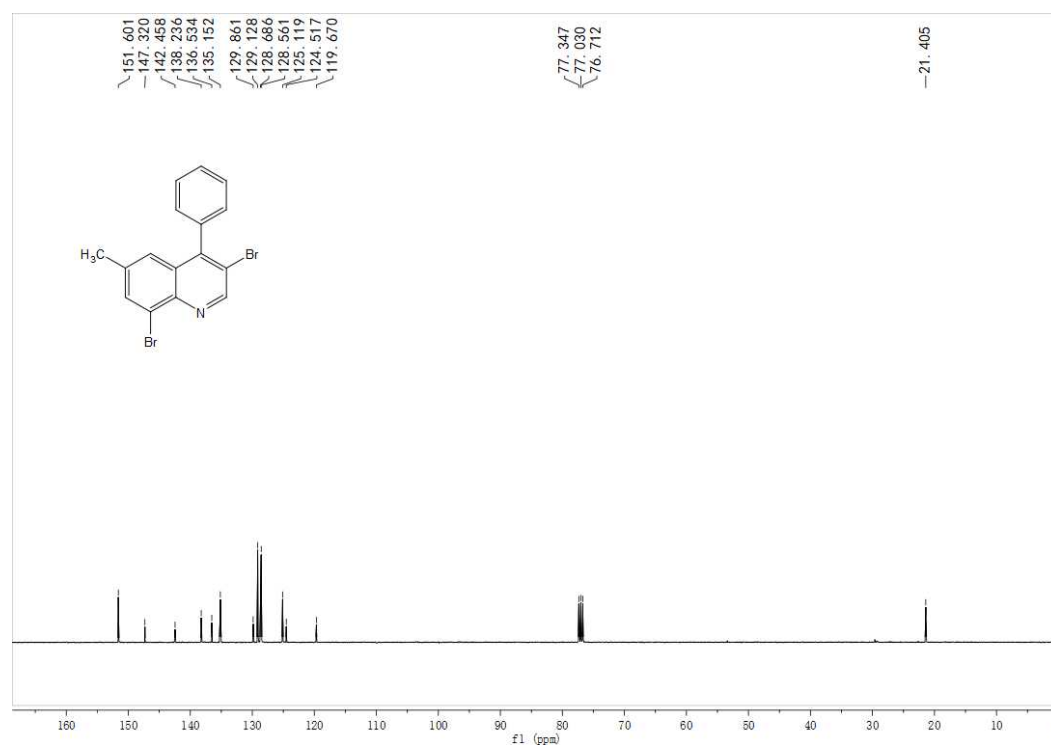

<sup>13</sup>C NMR (25°C, 100 MHz, CDCl<sub>3</sub>)

3,8-dibromo-6-butyl-4-phenylquinoline, **2e**

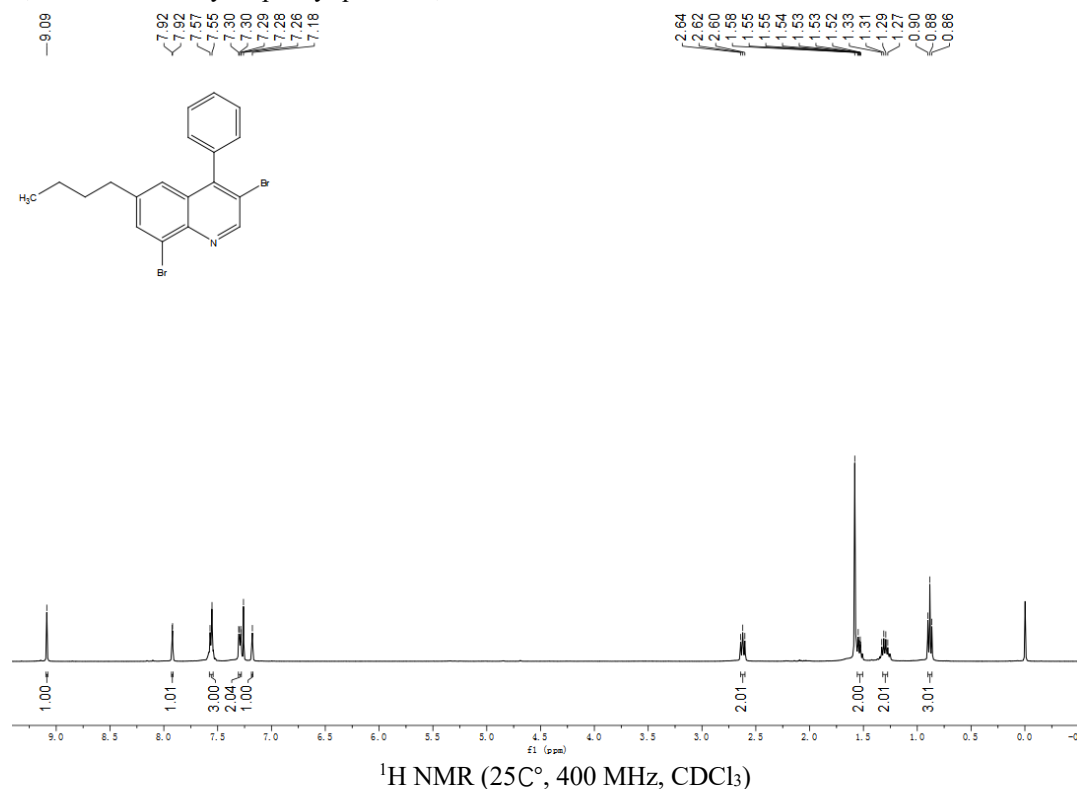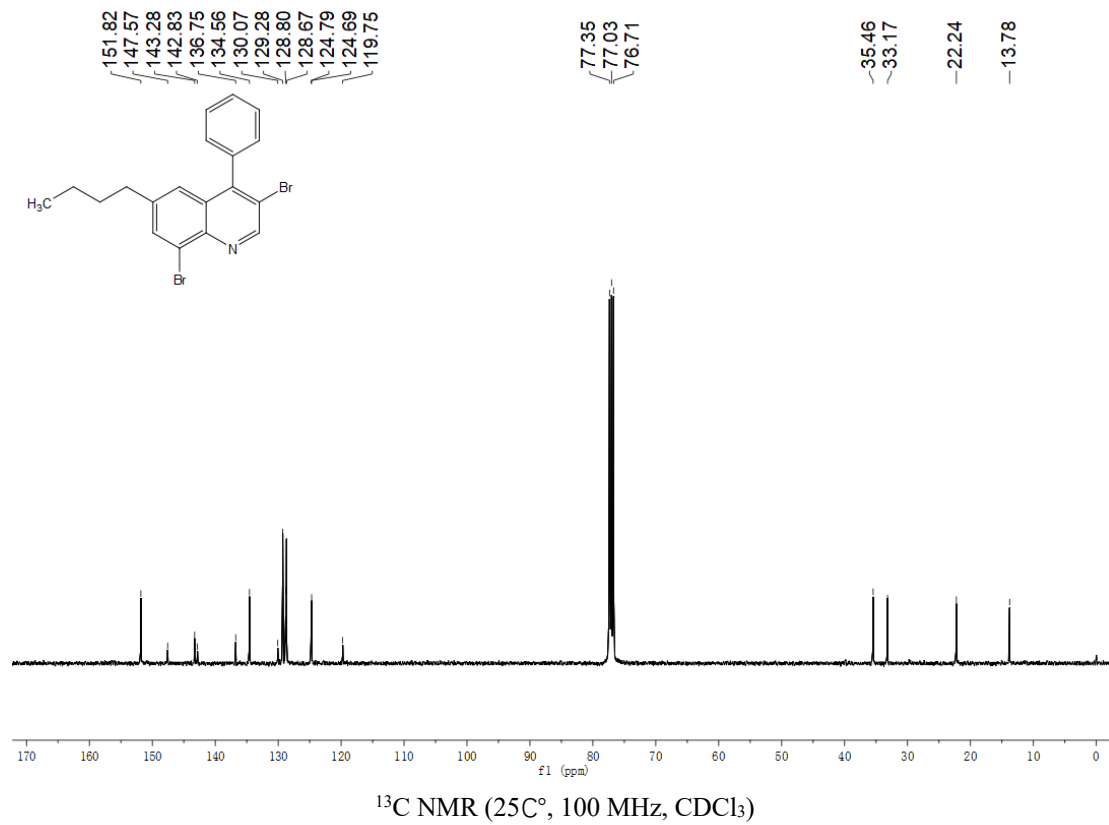

3,8-dibromo-6-(tert-butyl)-4-phenylquinoline, **2f**

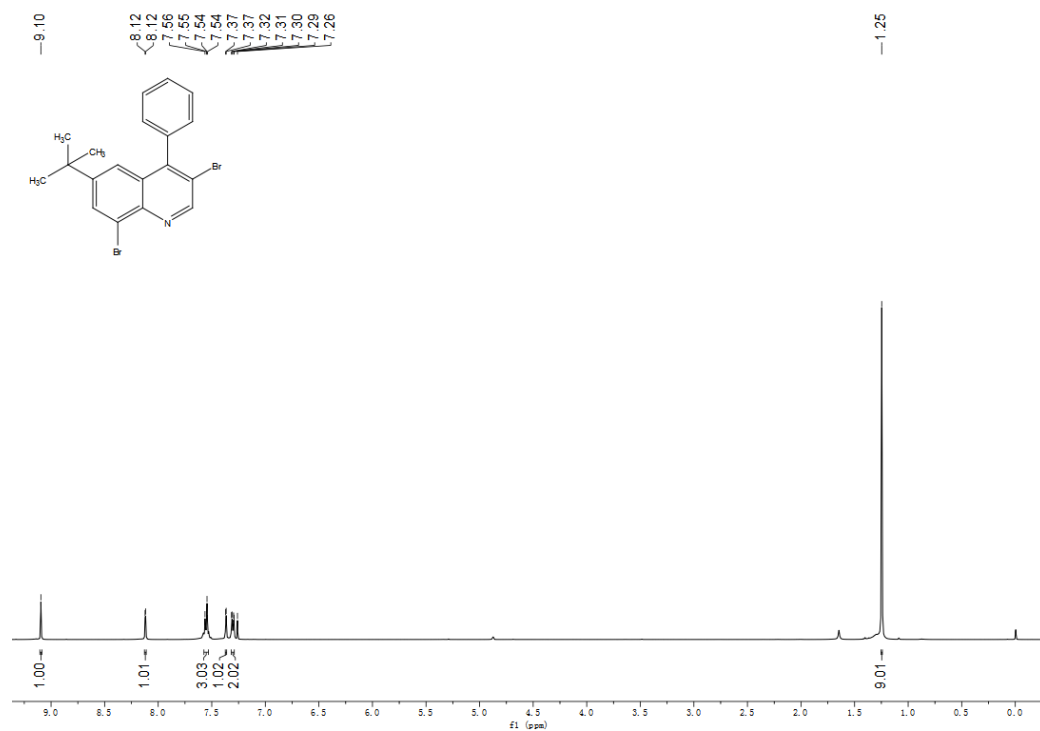

<sup>1</sup>H NMR (25°C, 400 MHz, CDCl<sub>3</sub>)

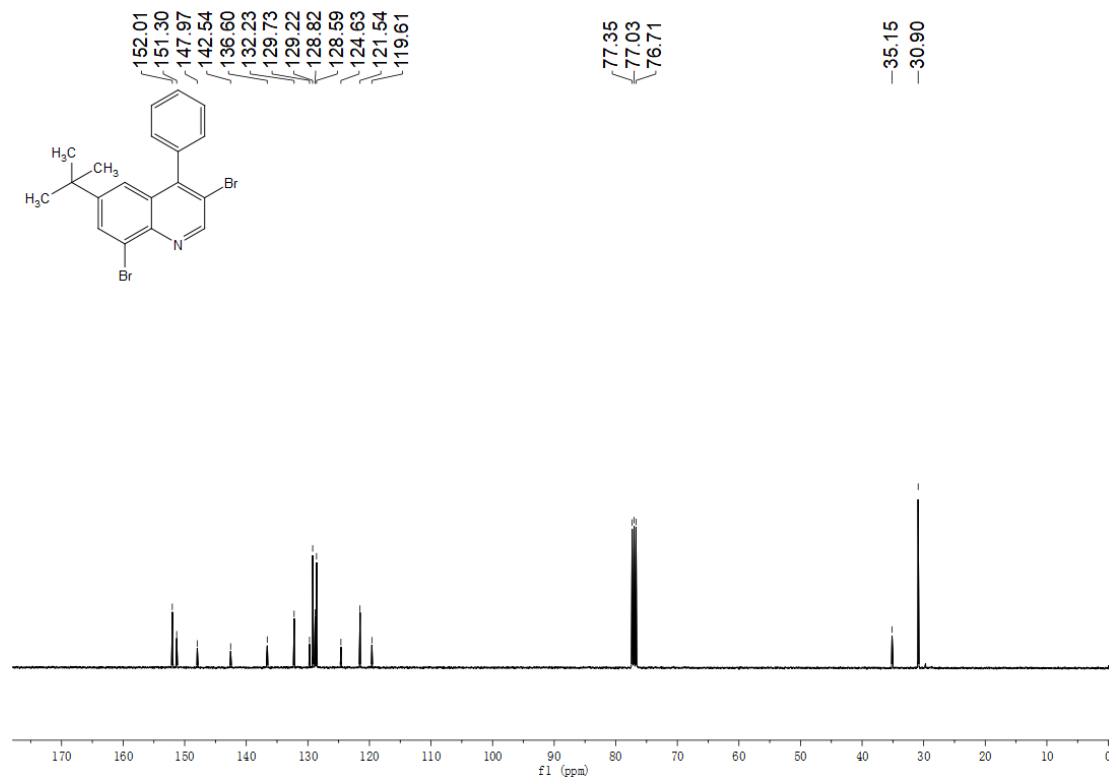

<sup>13</sup>C NMR (25°C, 100 MHz, CDCl<sub>3</sub>)

3,8-dibromo-6-methoxy-4-phenylquinoline, **2g**

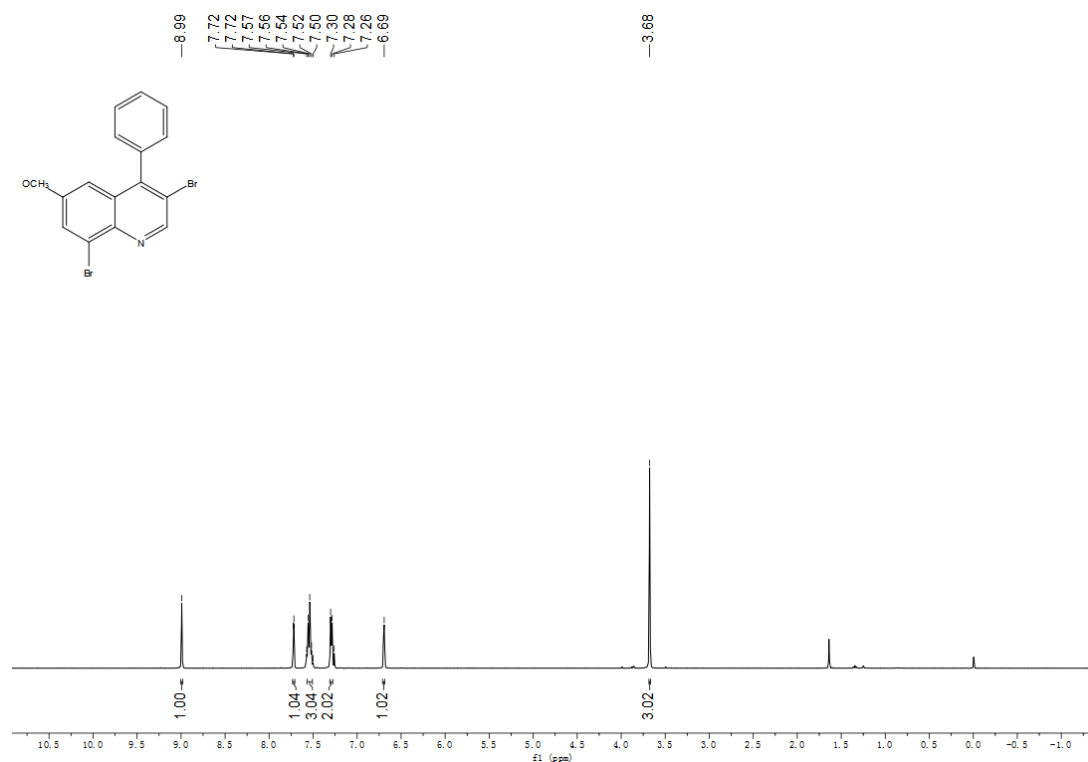

<sup>1</sup>H NMR (25°C, 400 MHz, CDCl<sub>3</sub>)

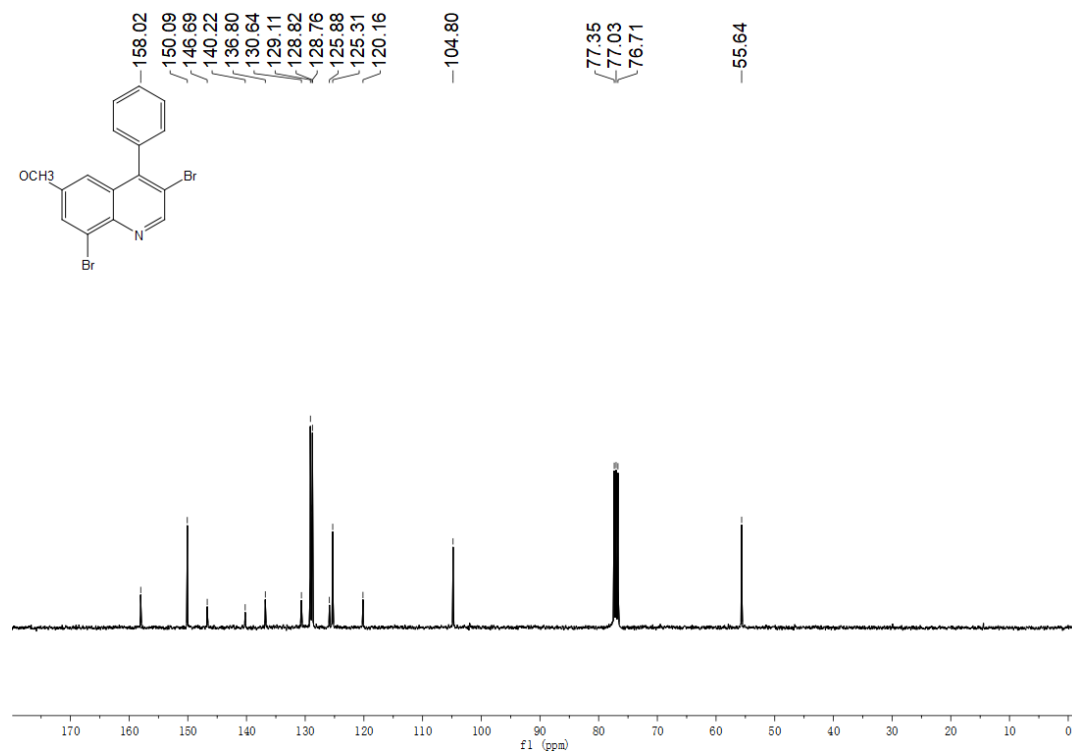

<sup>13</sup>C NMR (25°C, 100 MHz, CDCl<sub>3</sub>)

3,8-dibromo-4-phenyl-6-(trifluoromethoxy)quinoline, **2h**

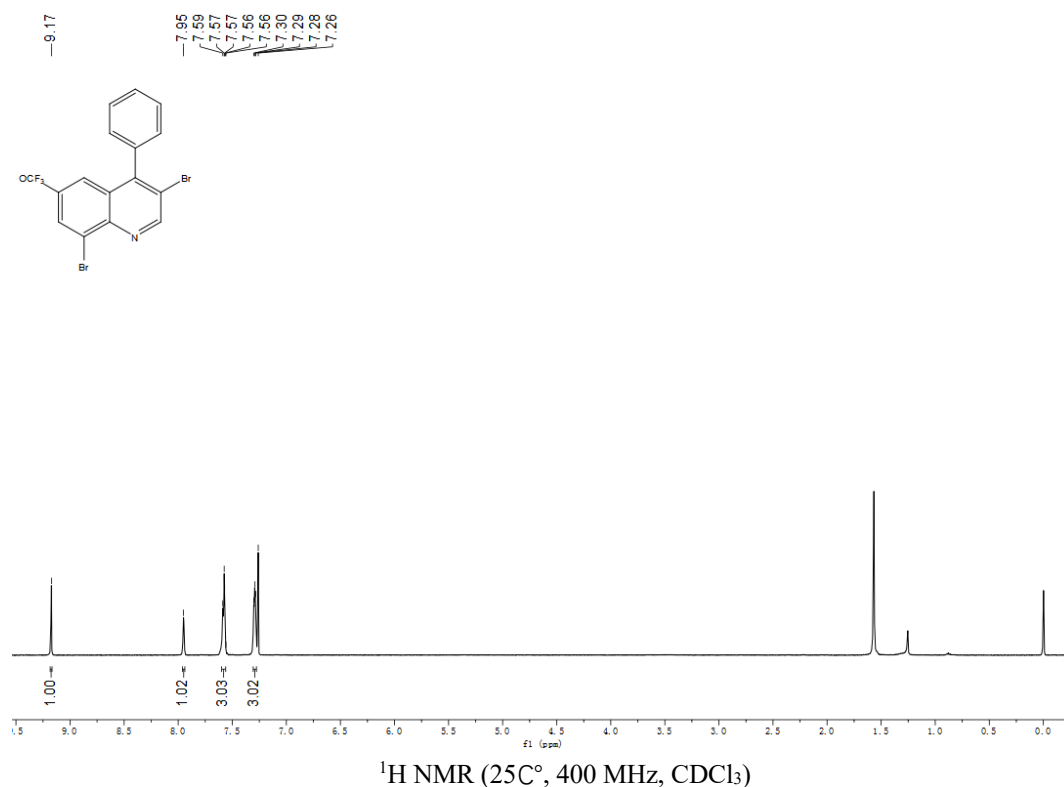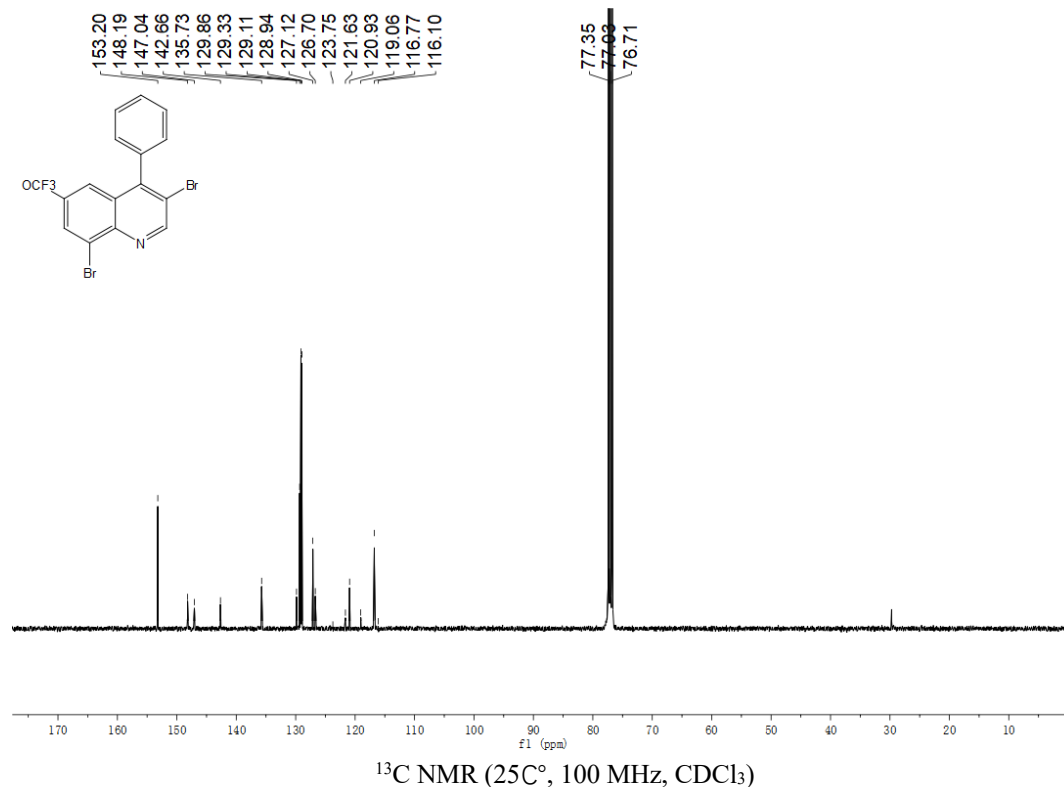

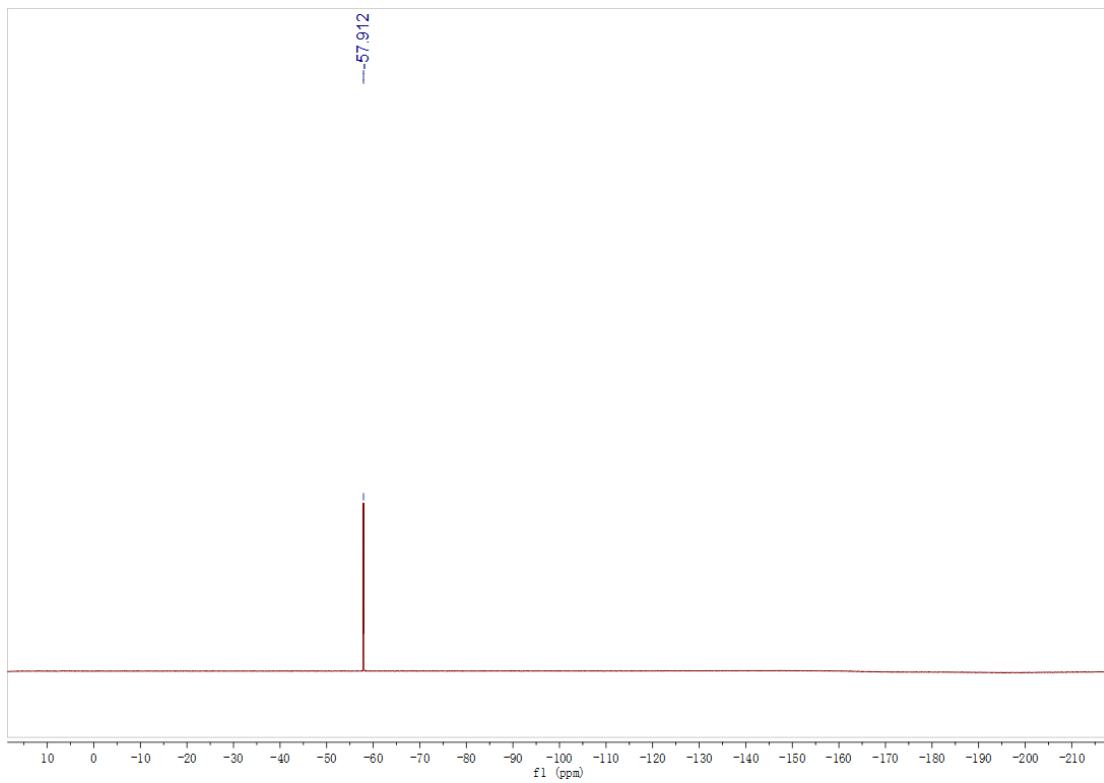

$^{19}\text{F}$  NMR (25°C, 376 MHz,  $\text{CDCl}_3$ )

3,6,8-tribromo-4-(4-fluorophenyl)quinoline, **2i**

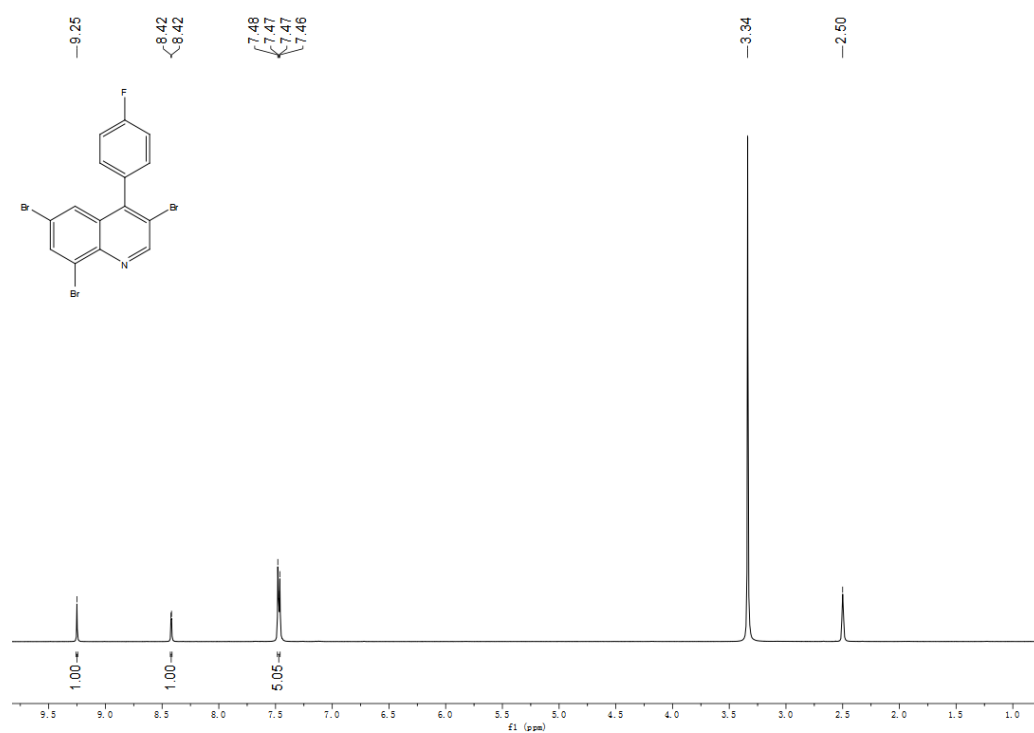

<sup>1</sup>H NMR (25°C, 400 MHz, DMSO)

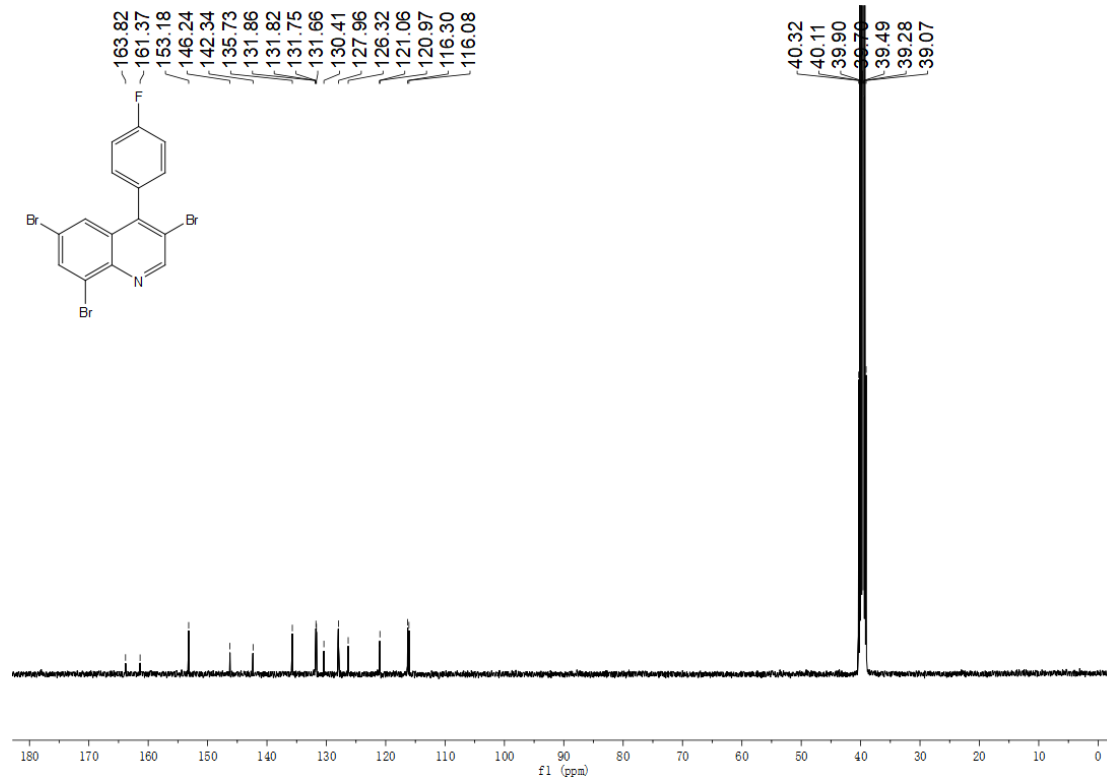

<sup>13</sup>C NMR (25°C, 100 MHz, DMSO)



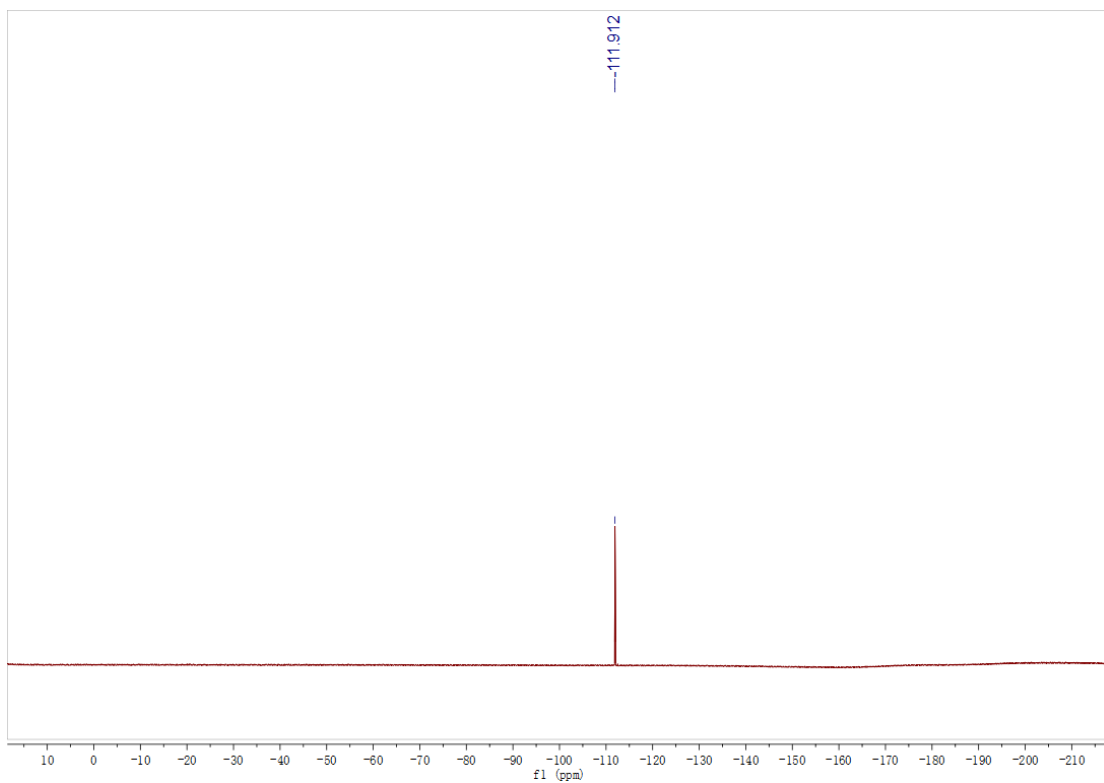

$^{19}\text{F}$  NMR (25°C, 376 MHz, DMSO)

6,8-dibromo-3-pentyl-4-phenylquinoline, **2j**

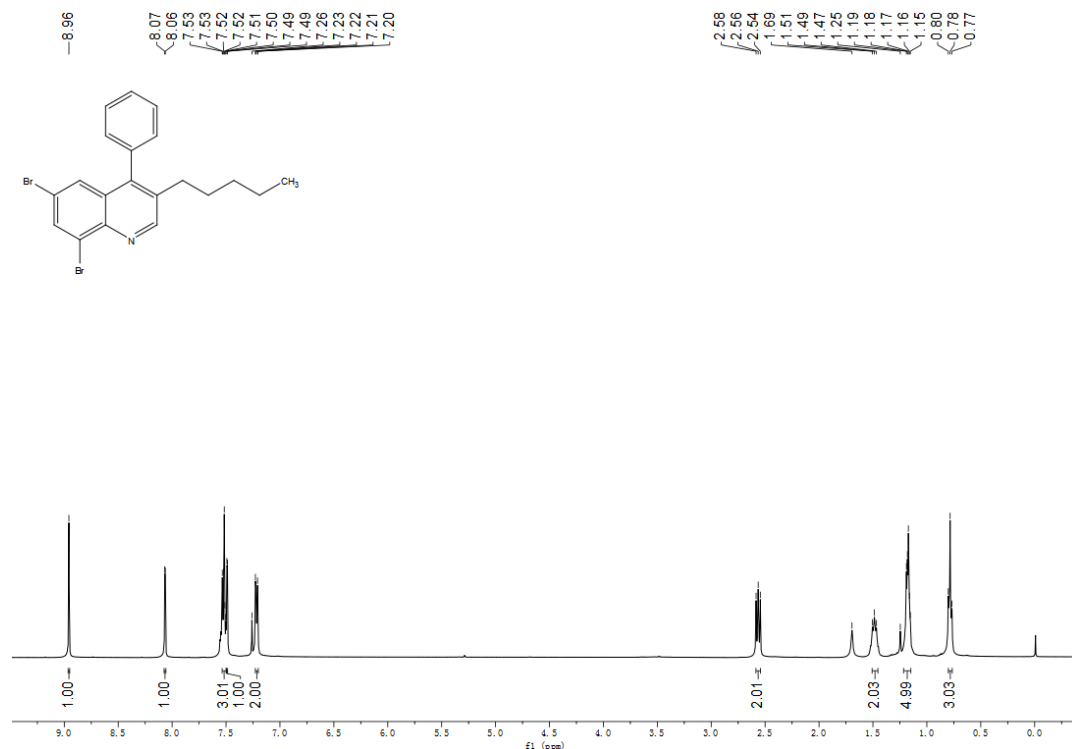

<sup>1</sup>H NMR (25°C, 400 MHz, CDCl<sub>3</sub>)

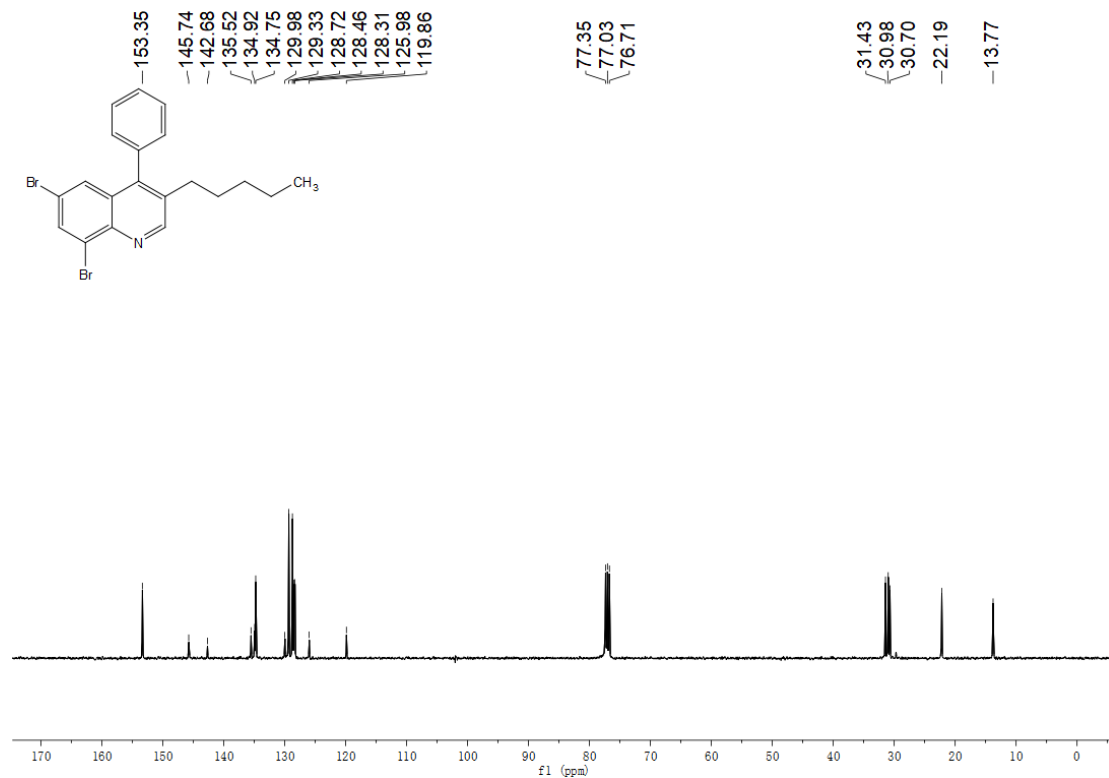

<sup>13</sup>C NMR (25°C, 100 MHz, CDCl<sub>3</sub>)

6,8-dibromo-3-methyl-4-phenylquinoline, **2k**

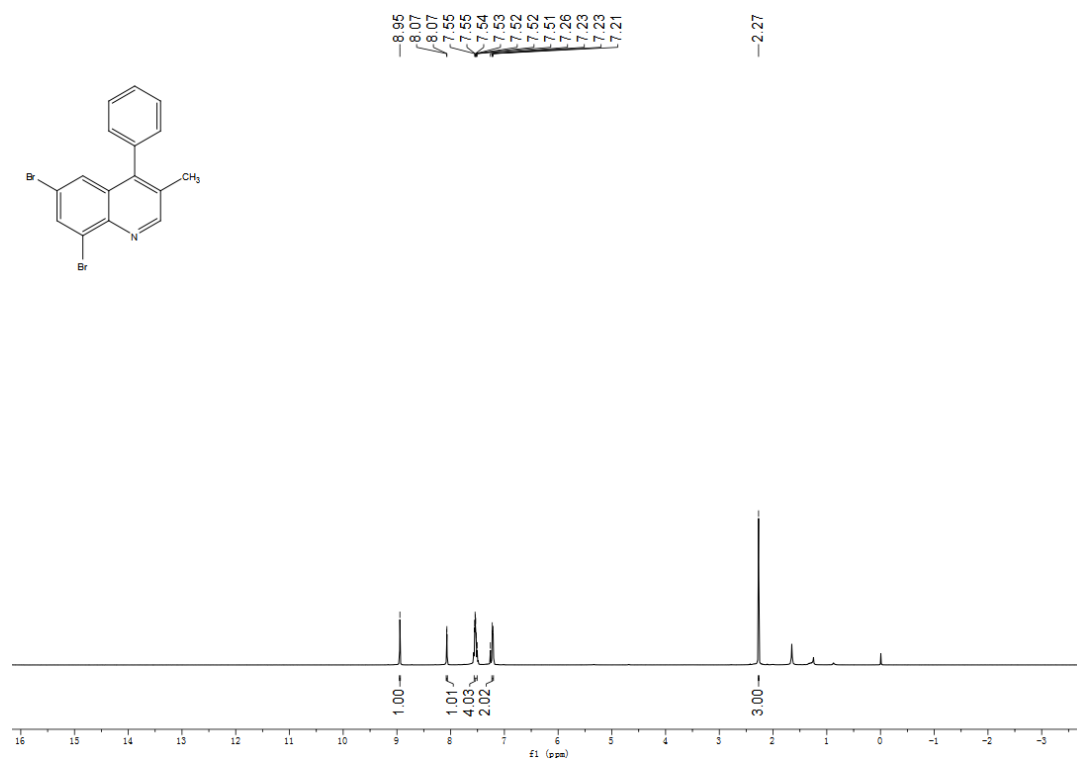

<sup>1</sup>H NMR (25°C, 400 MHz, CDCl<sub>3</sub>)

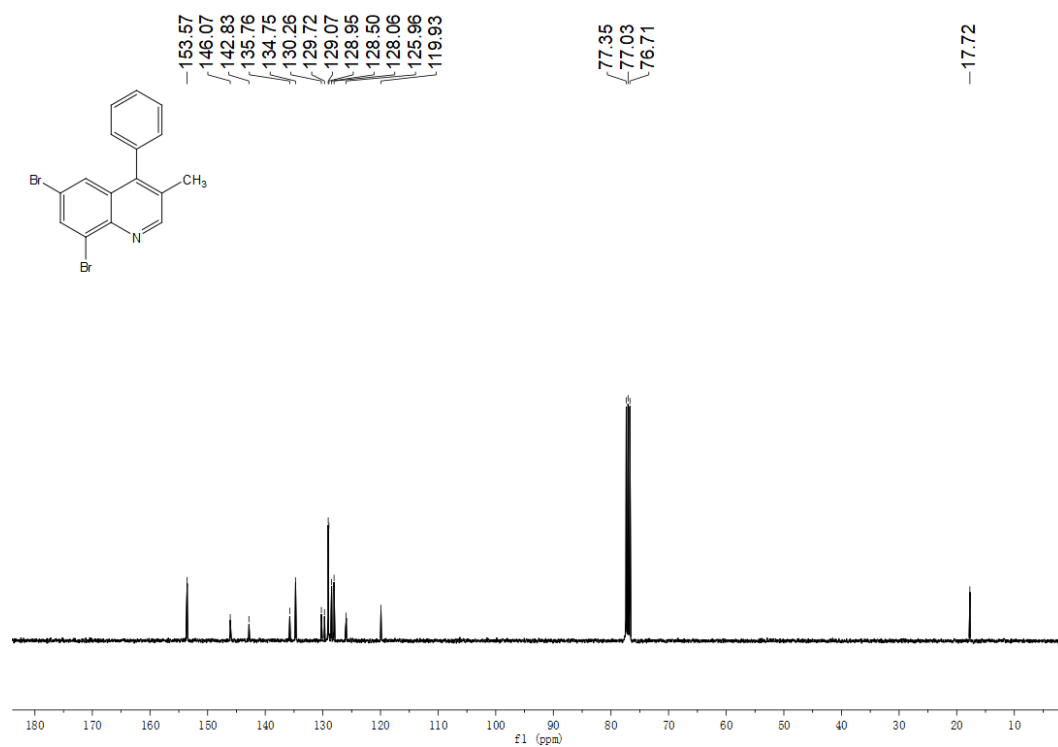

<sup>13</sup>C NMR (25°C, 100 MHz, CDCl<sub>3</sub>)

8-bromo-3,6-dimethyl-4-phenylquinoline, **21**

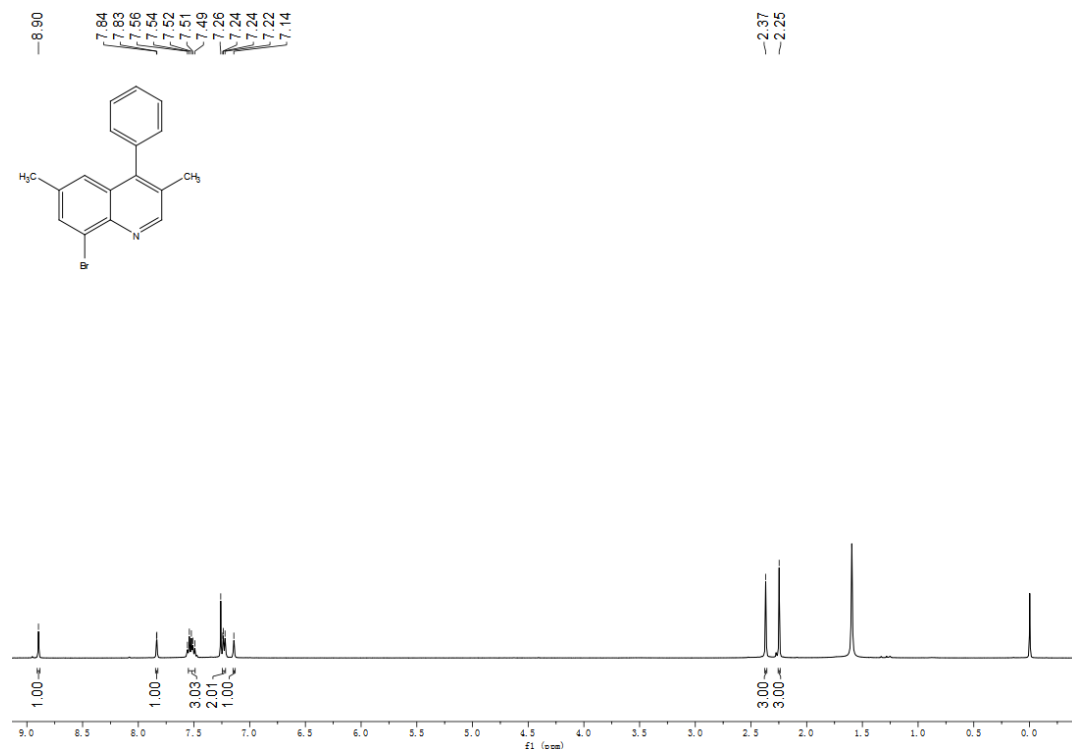

<sup>1</sup>H NMR (25°C, 400 MHz, CDCl<sub>3</sub>)

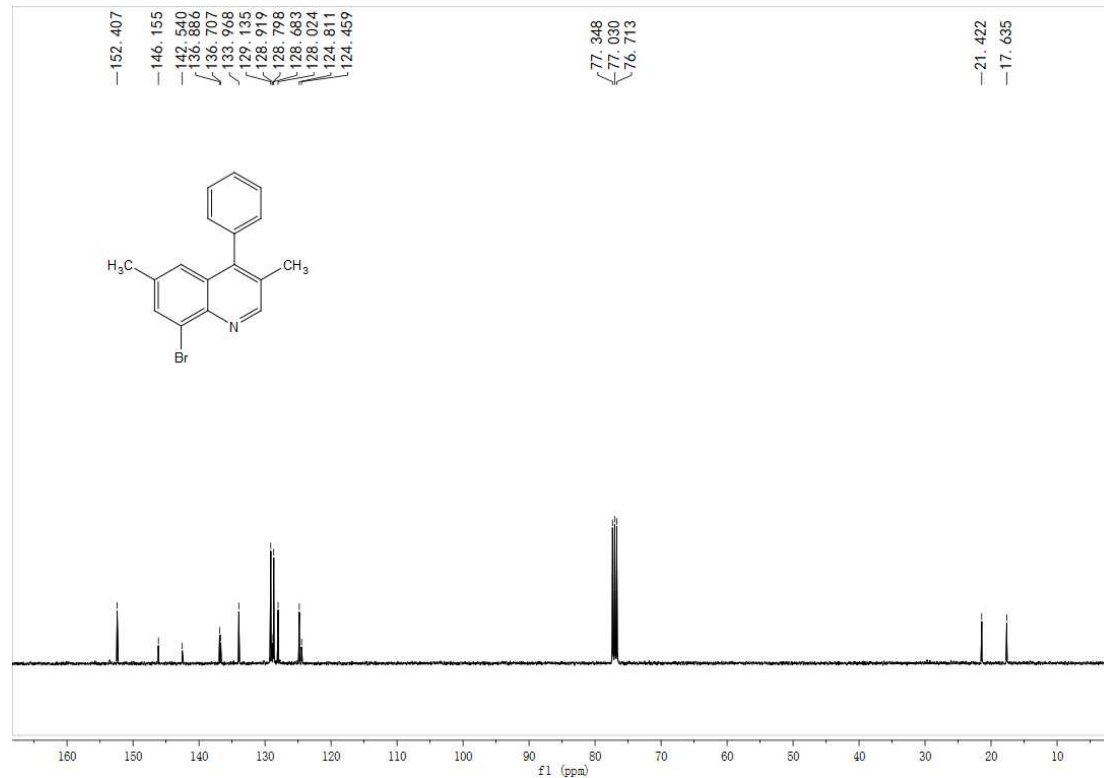

<sup>13</sup>C NMR (25°C, 100 MHz, CDCl<sub>3</sub>)

8-bromo-6-chloro-3-methyl-4-phenylquinoline, **2m**

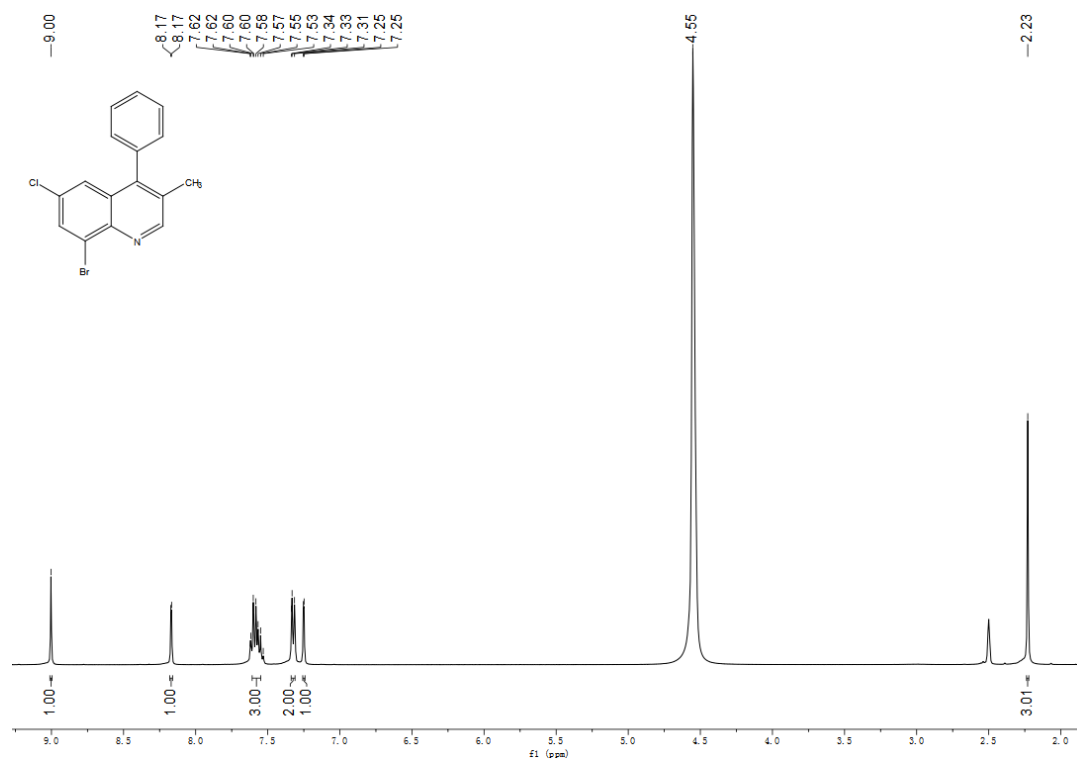

<sup>1</sup>H NMR (25°C, 400 MHz, DMSO)

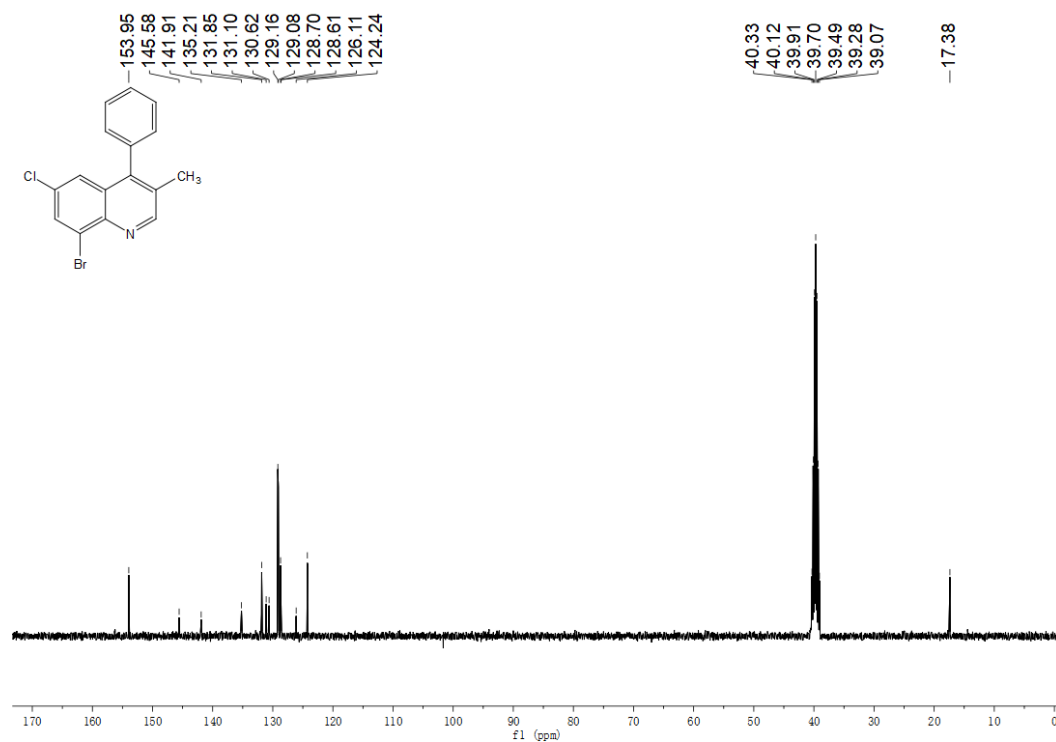

<sup>13</sup>C NMR (25°C, 100 MHz, DMSO)

3,6-dibromo-8-methyl-4-phenylquinoline, **2n**

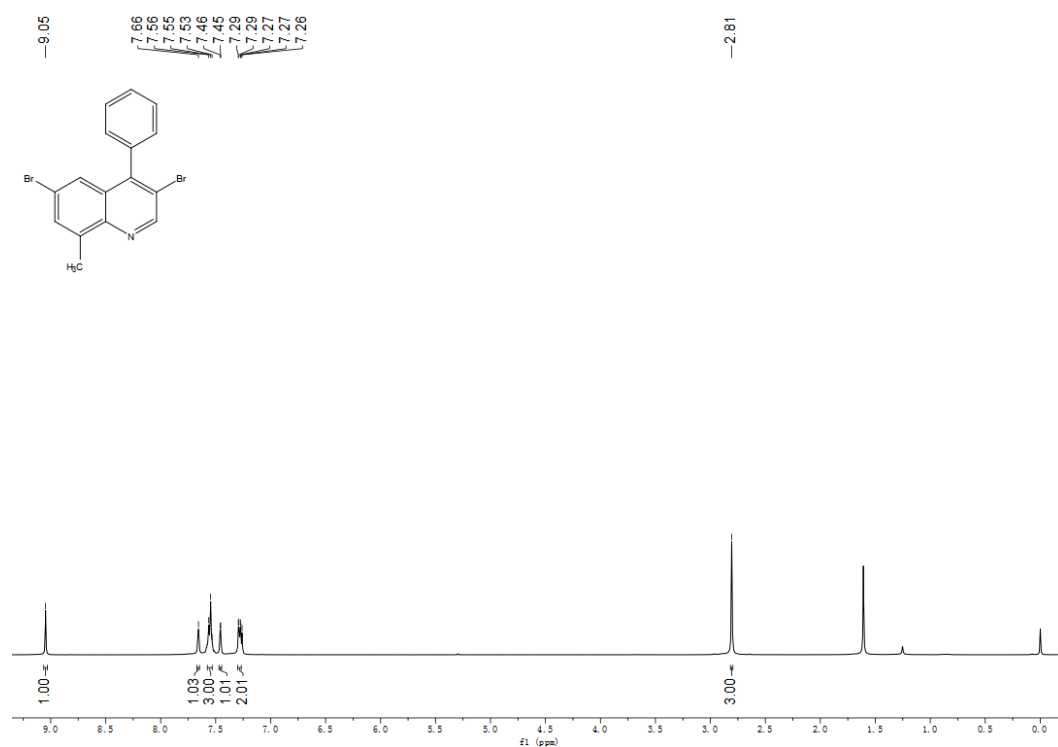

<sup>1</sup>H NMR (25°C, 400 MHz, CDCl<sub>3</sub>)

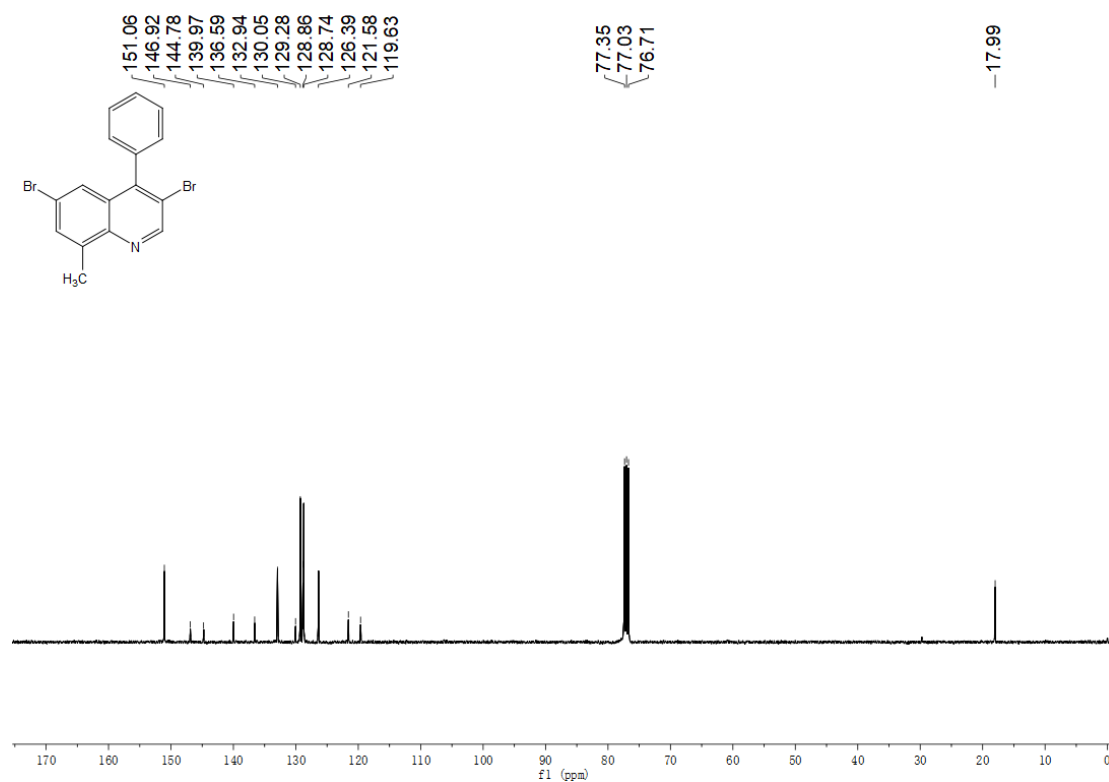

<sup>13</sup>C NMR (25°C, 100 MHz, CDCl<sub>3</sub>)

3,6-dibromo-8-methoxy-4-phenylquinoline, **2o**

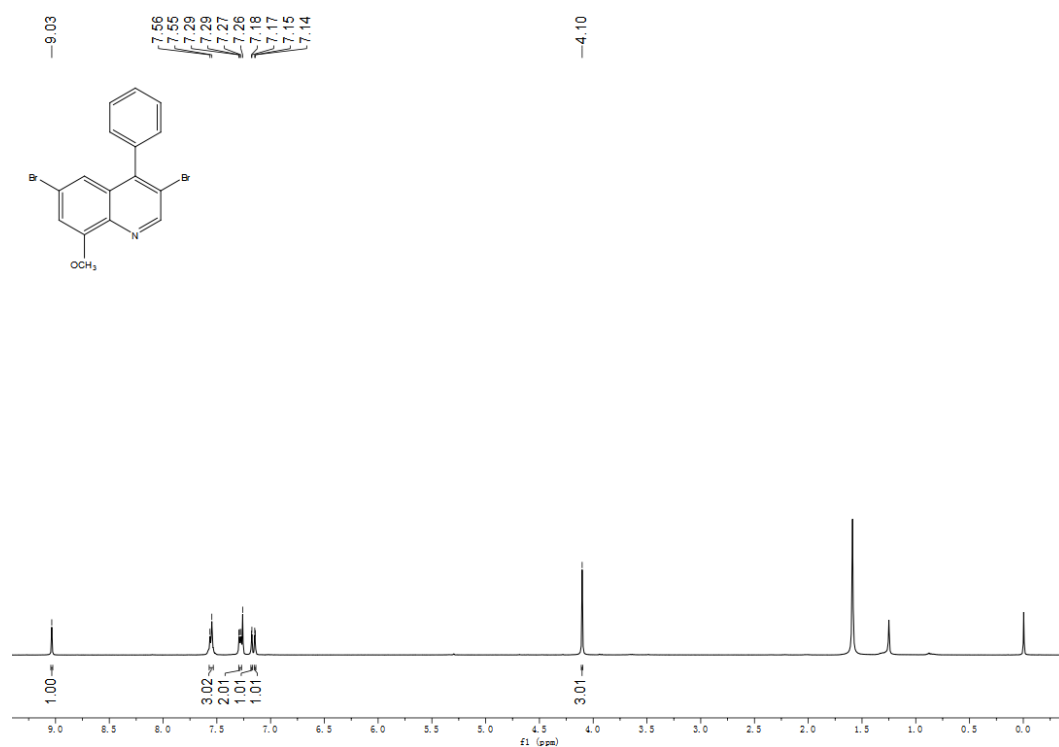

<sup>1</sup>H NMR (25°C, 400 MHz, CDCl<sub>3</sub>)

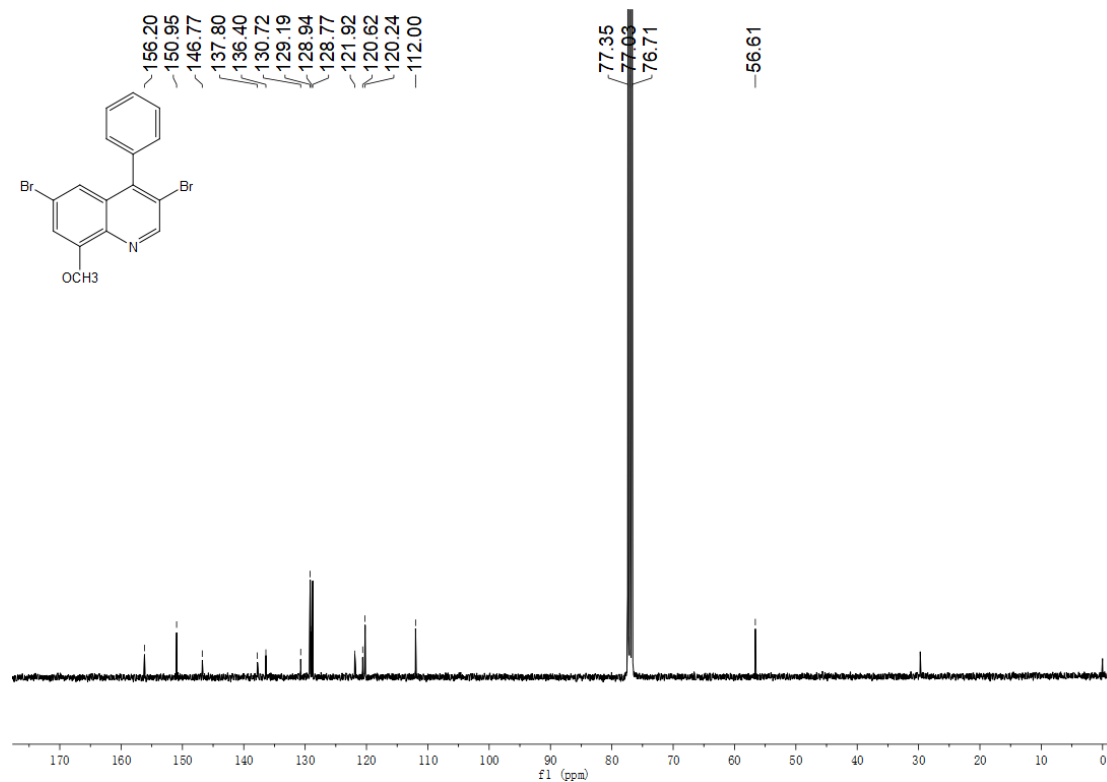

<sup>13</sup>C NMR (25°C, 100 MHz, CDCl<sub>3</sub>)

3-bromo-6,8-dimethyl-4-phenylquinoline, **2p**

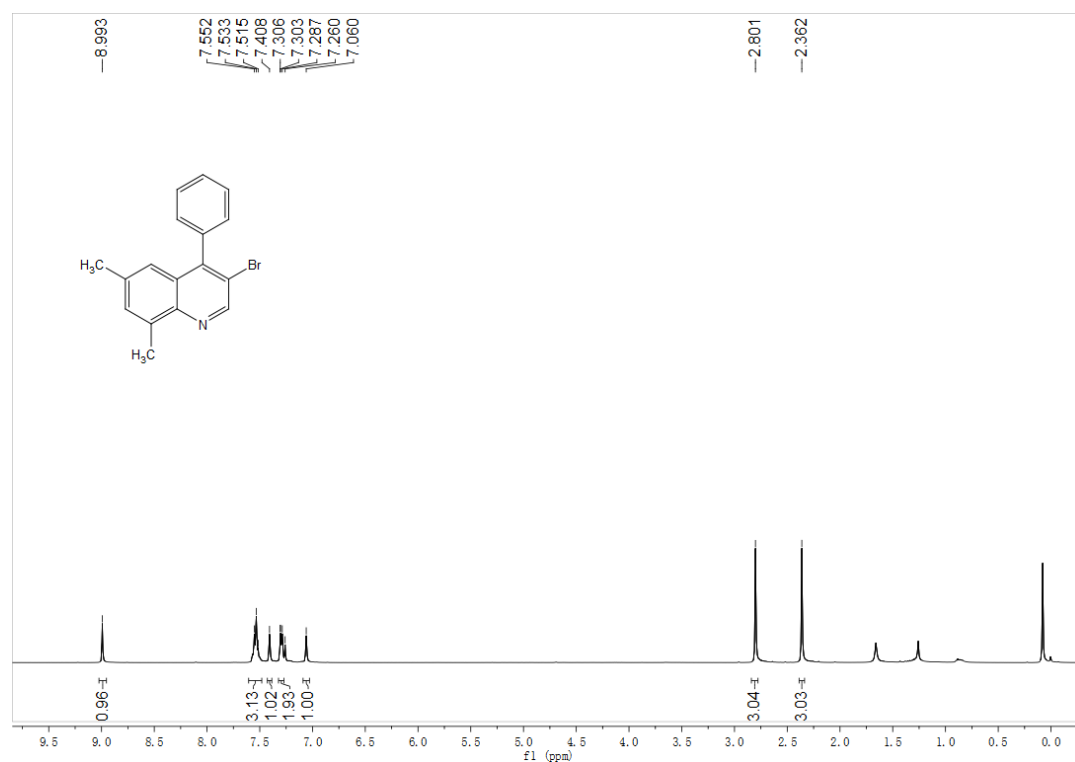

$^1\text{H NMR}$  (25°C, 400 MHz,  $\text{CDCl}_3$ )

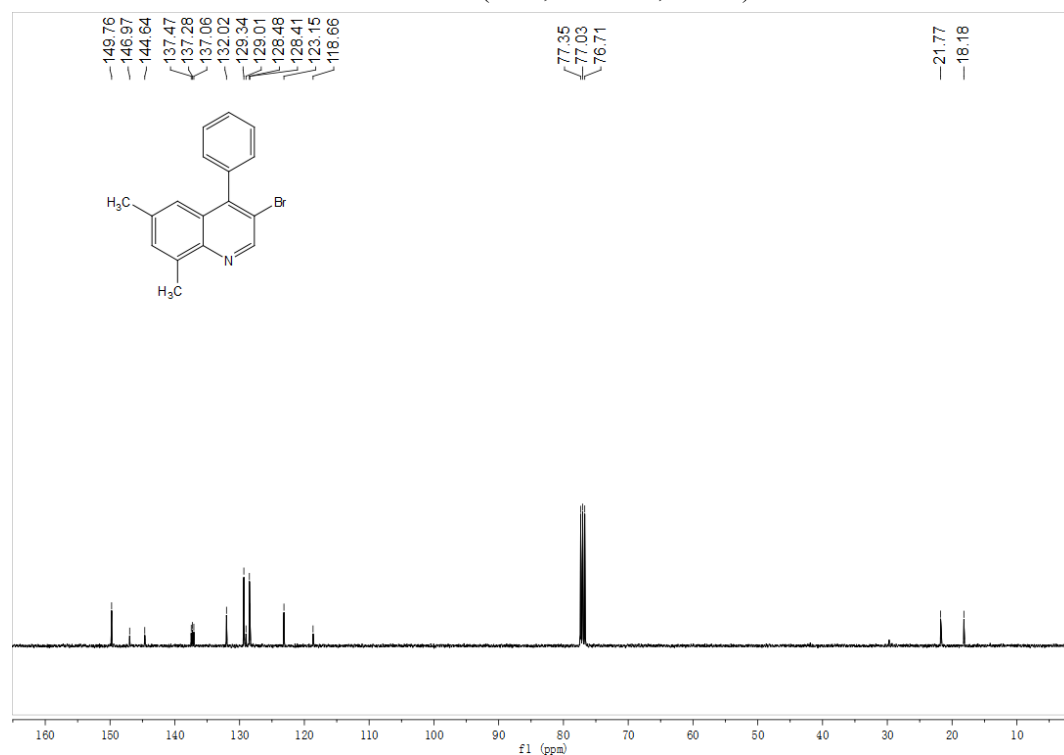

$^{13}\text{C NMR}$  (25°C, 100 MHz,  $\text{CDCl}_3$ )



### 3,6,8-tribromoquinoline, 2q

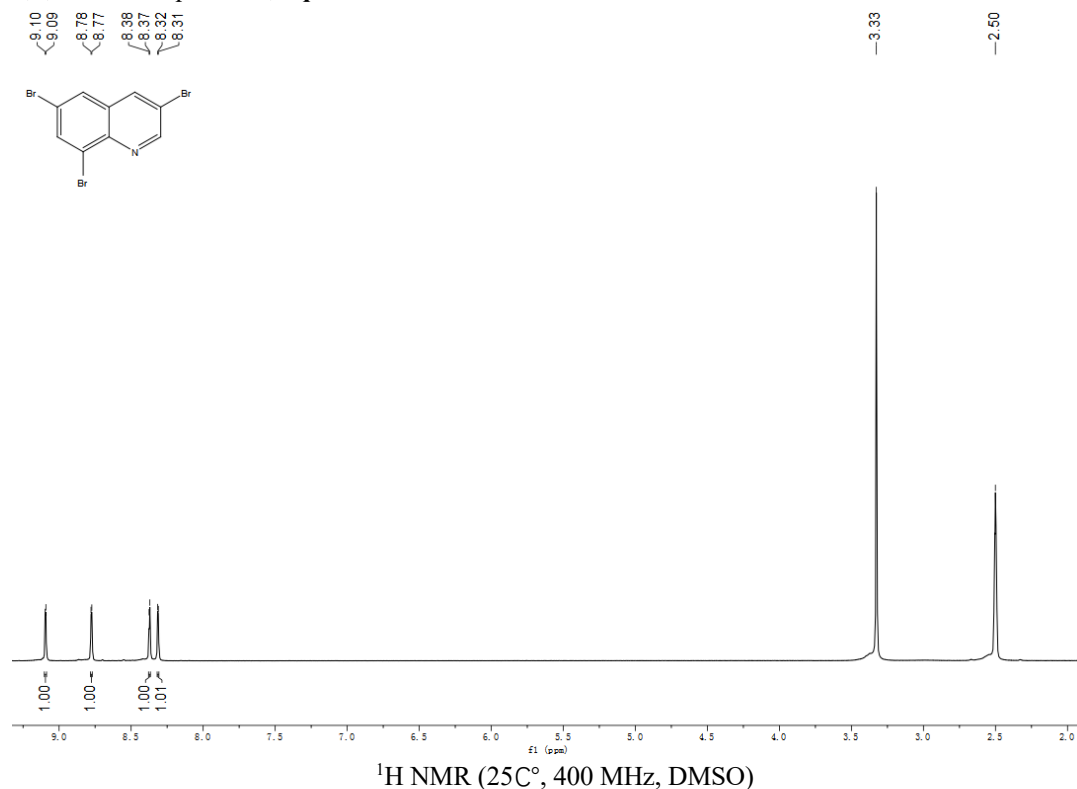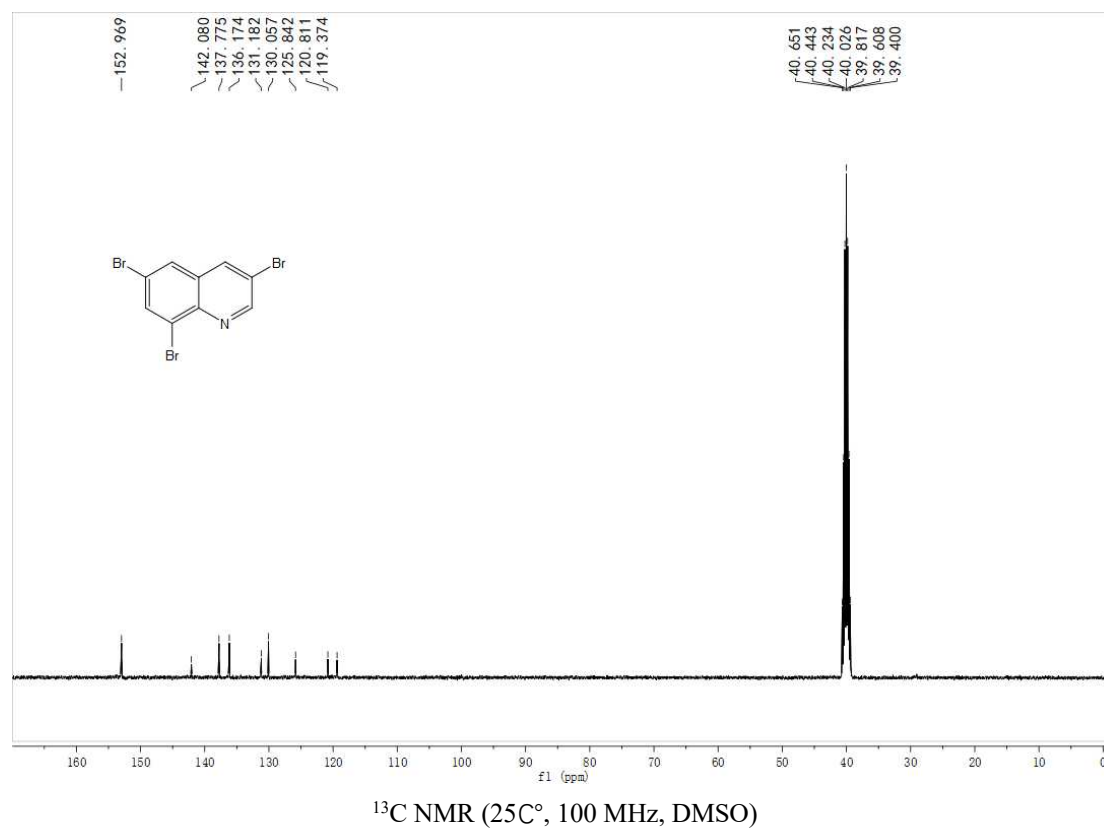

methyl 3,8-dibromoquinoline-6-carboxylate, **2r**

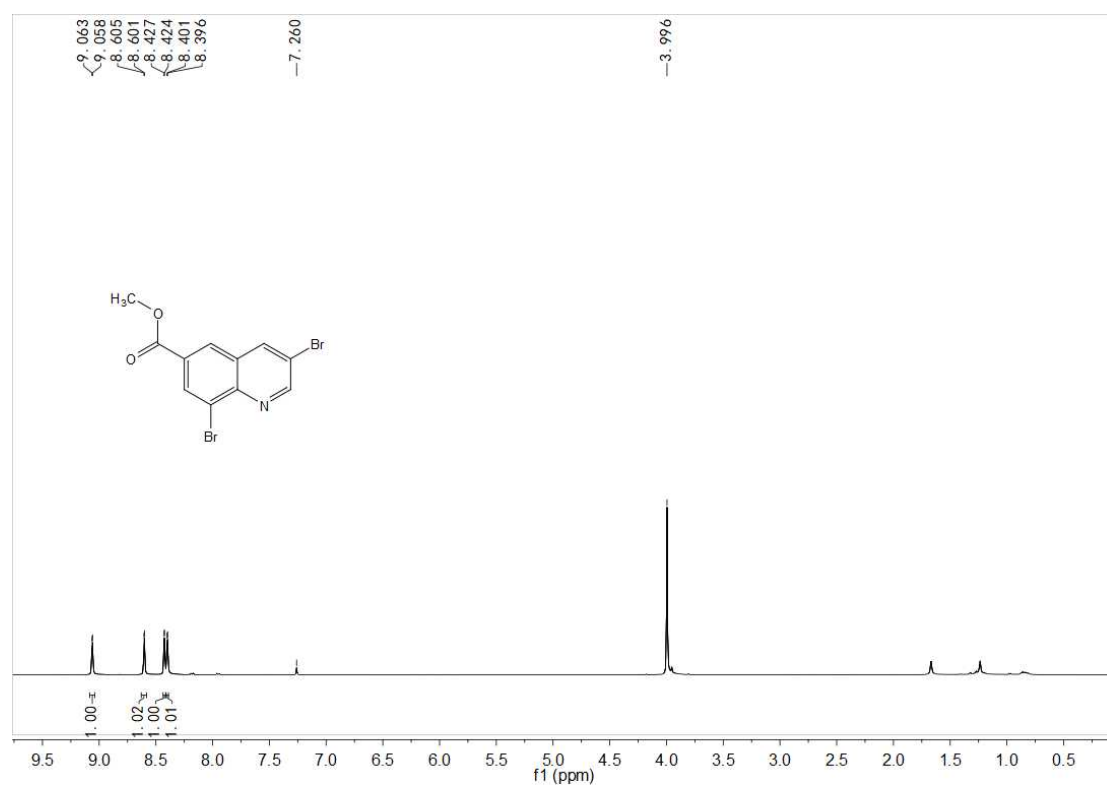

<sup>1</sup>H NMR (25°C, 400 MHz, CDCl<sub>3</sub>)

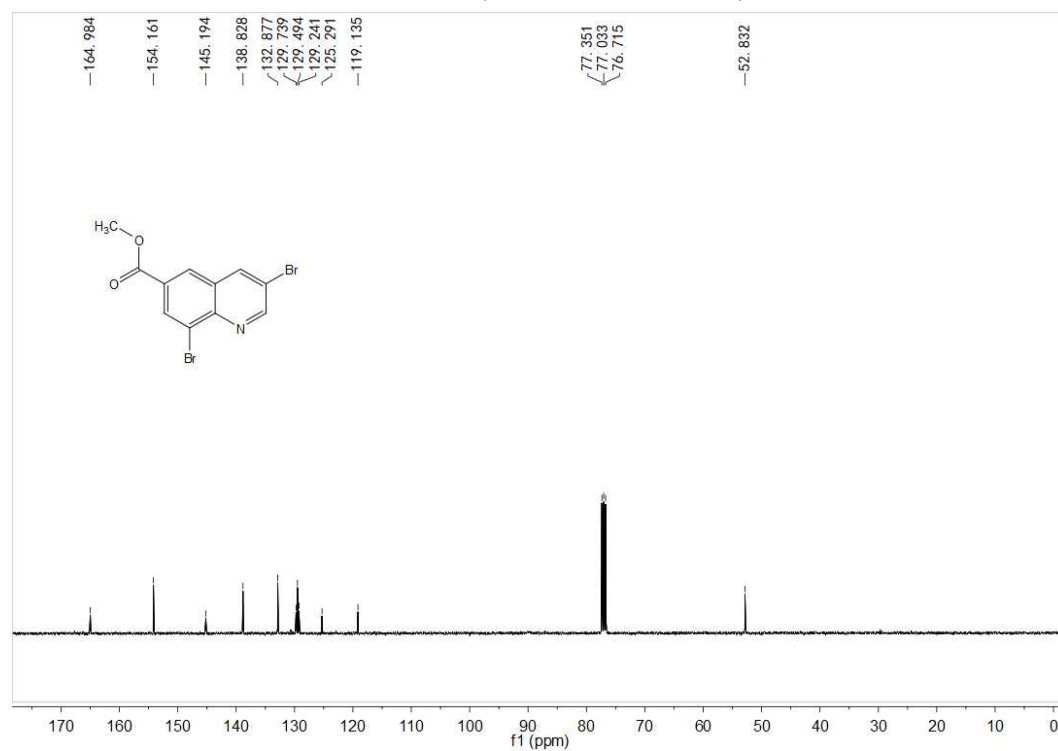

<sup>13</sup>C NMR (25°C, 100 MHz, CDCl<sub>3</sub>)

6-bromo-4-phenylquinoline, **2a1**

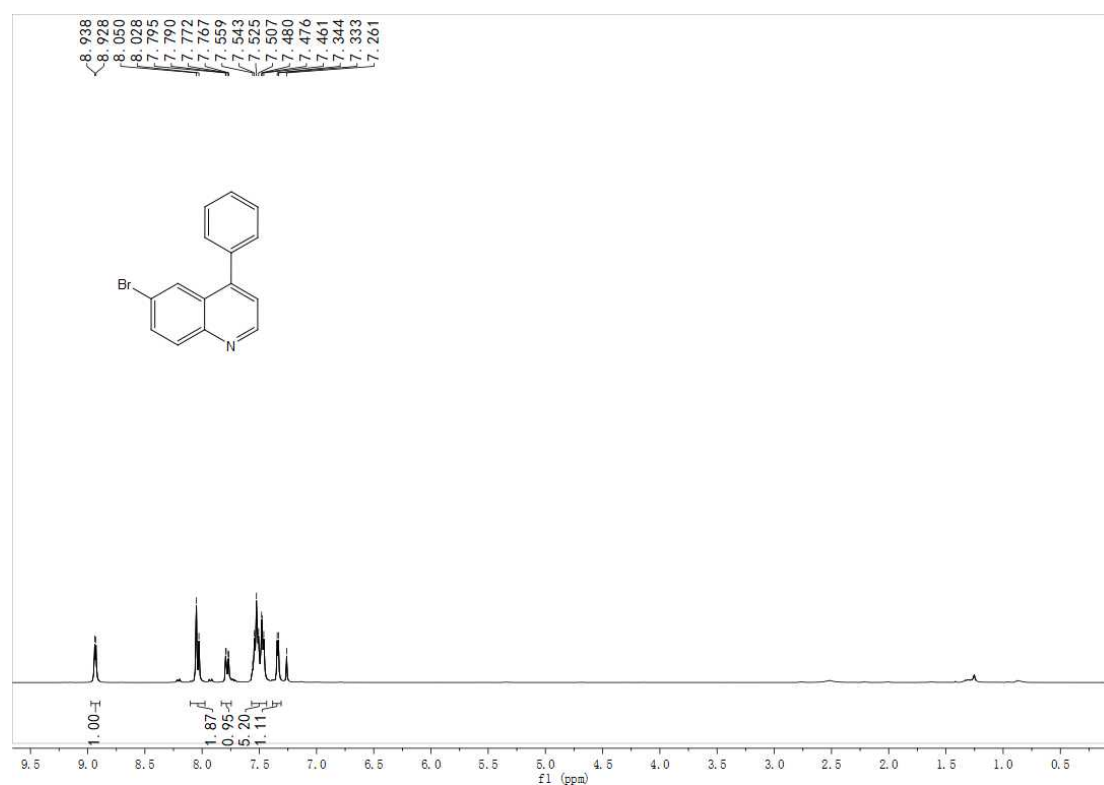

$^1\text{H}$  NMR (25°C, 400 MHz,  $\text{CDCl}_3$ )

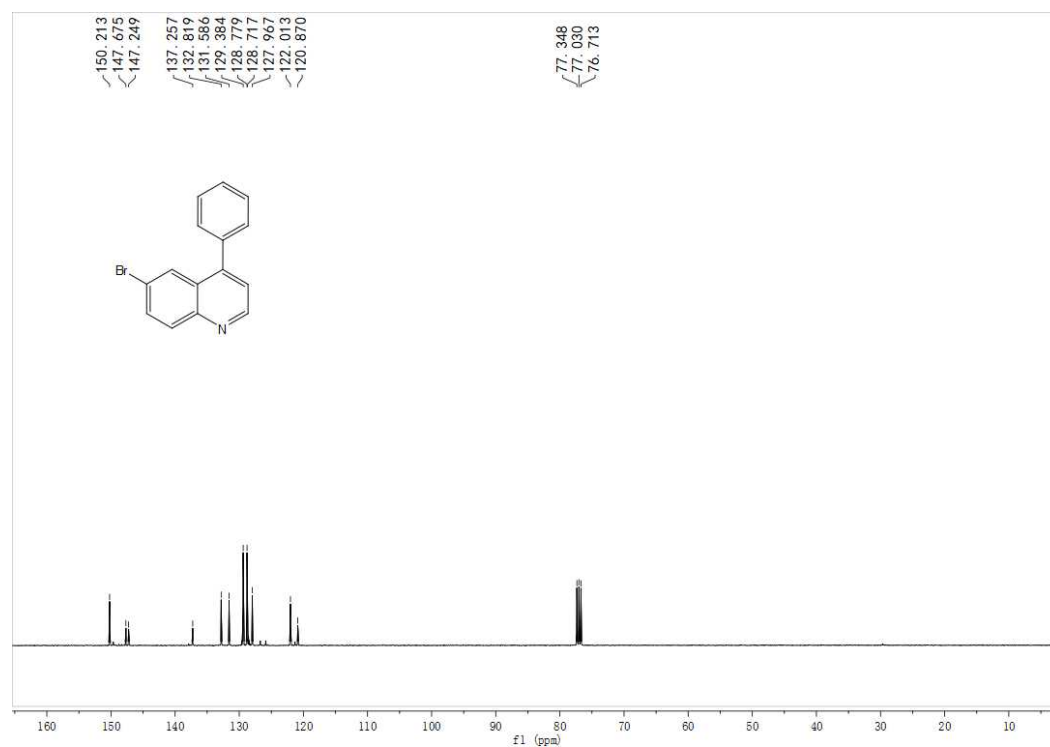

$^{13}\text{C}$  NMR (25°C, 100 MHz,  $\text{CDCl}_3$ )

3,6,8-tribromo-4-phenyl-3,4-dihydroquinolin-2(1H)-one, **2a2**

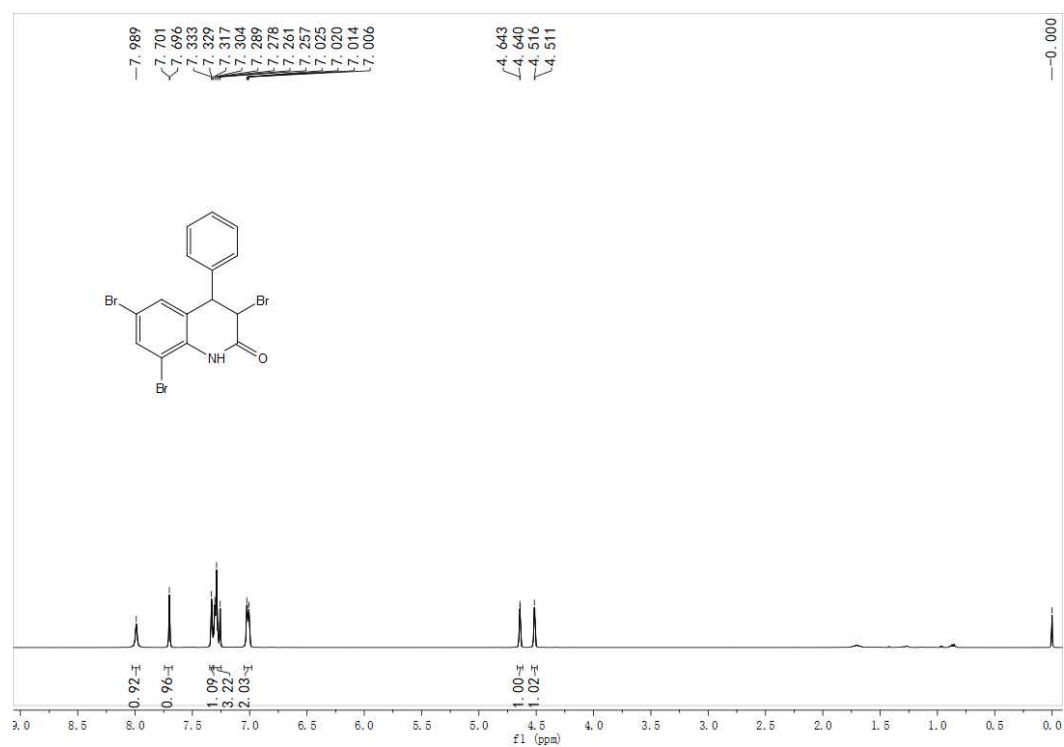

<sup>1</sup>H NMR (25°C, 400 MHz, CDCl<sub>3</sub>)

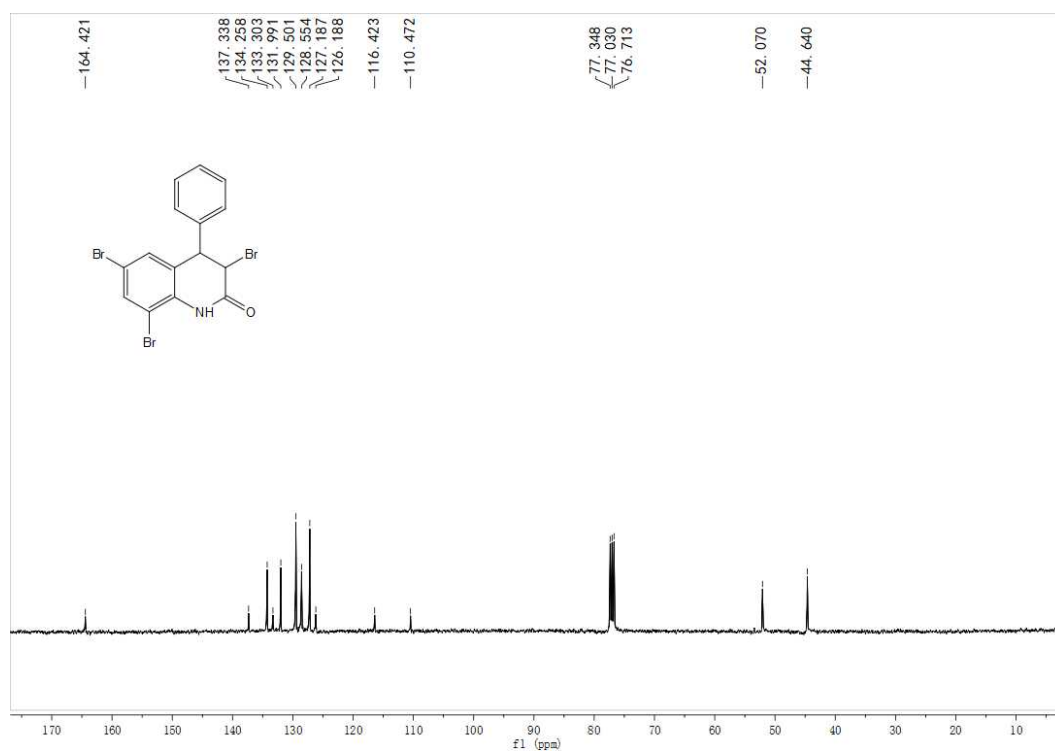

<sup>13</sup>C NMR (25°C, 100 MHz, CDCl<sub>3</sub>)

8-bromo-6-chloro-4-phenyl-3,4-dihydroquinolin-2(1H)-one, **2b1**

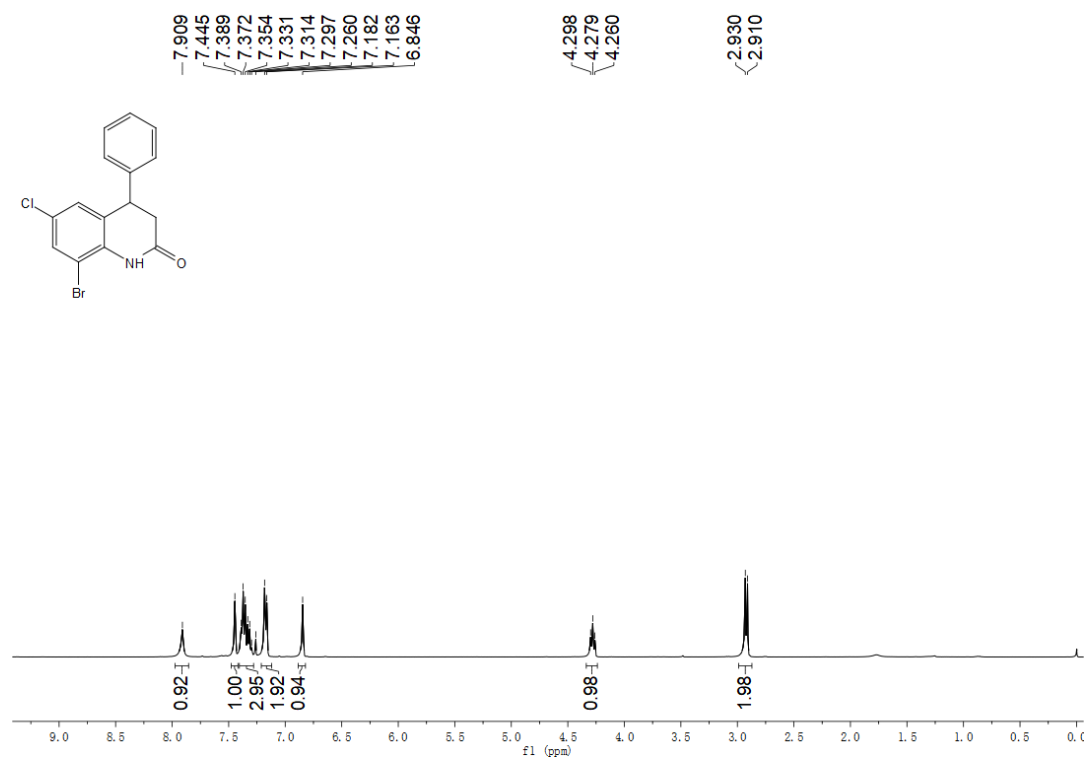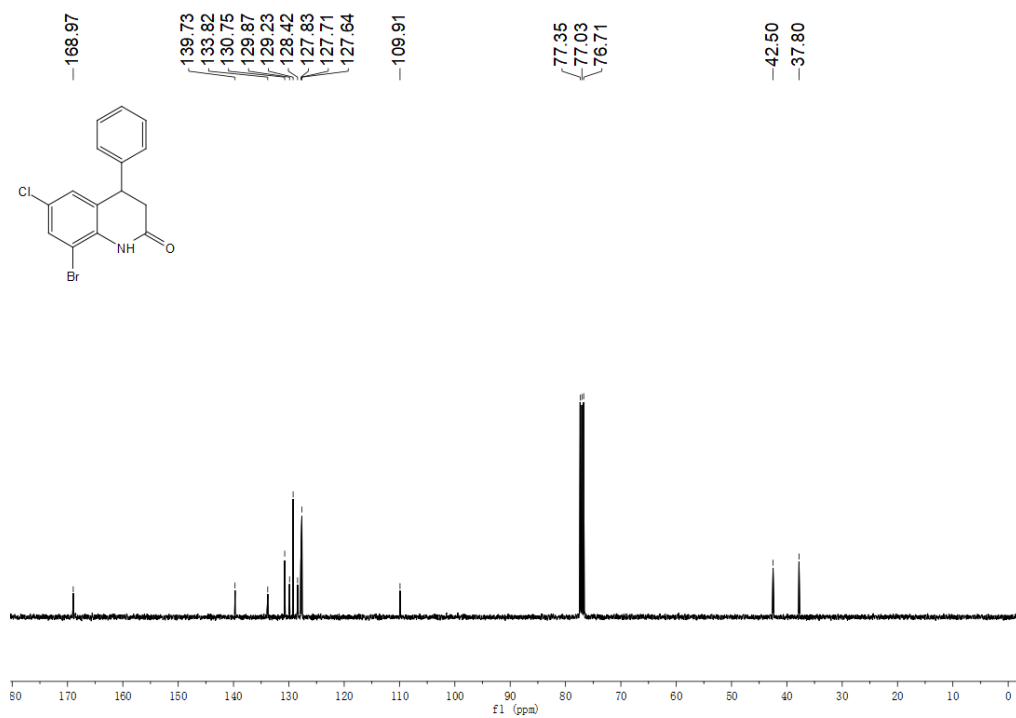

3,8-dibromo-6-chloro-4-phenyl-3,4-dihydroquinolin-2(1H)-one, **2b2**

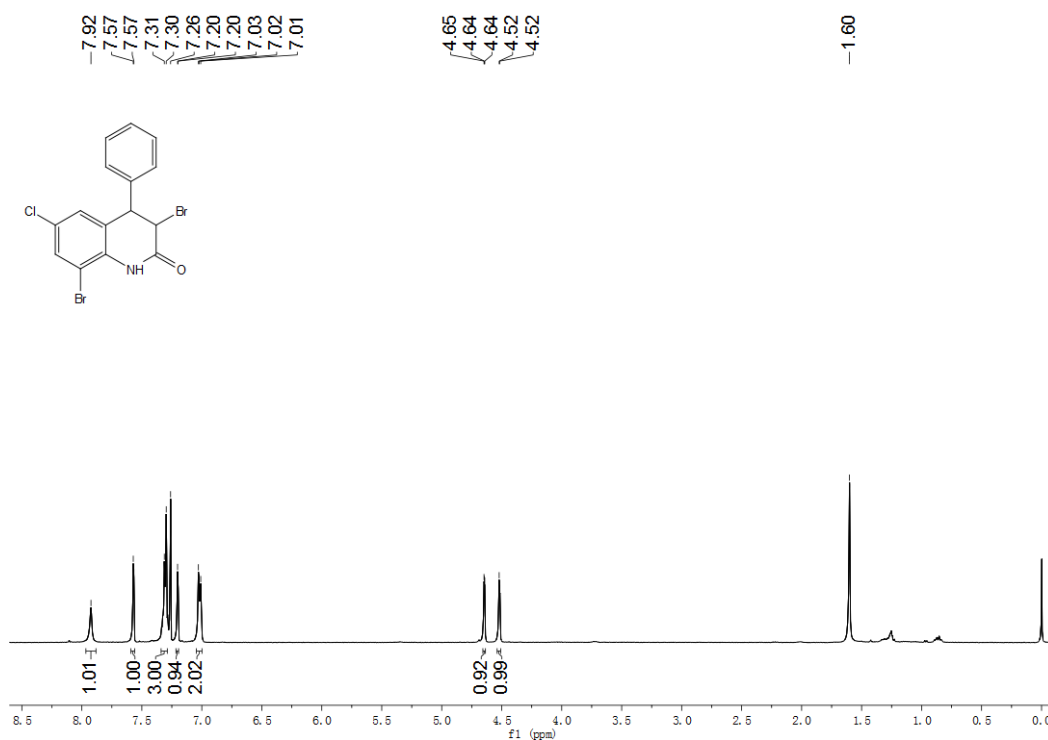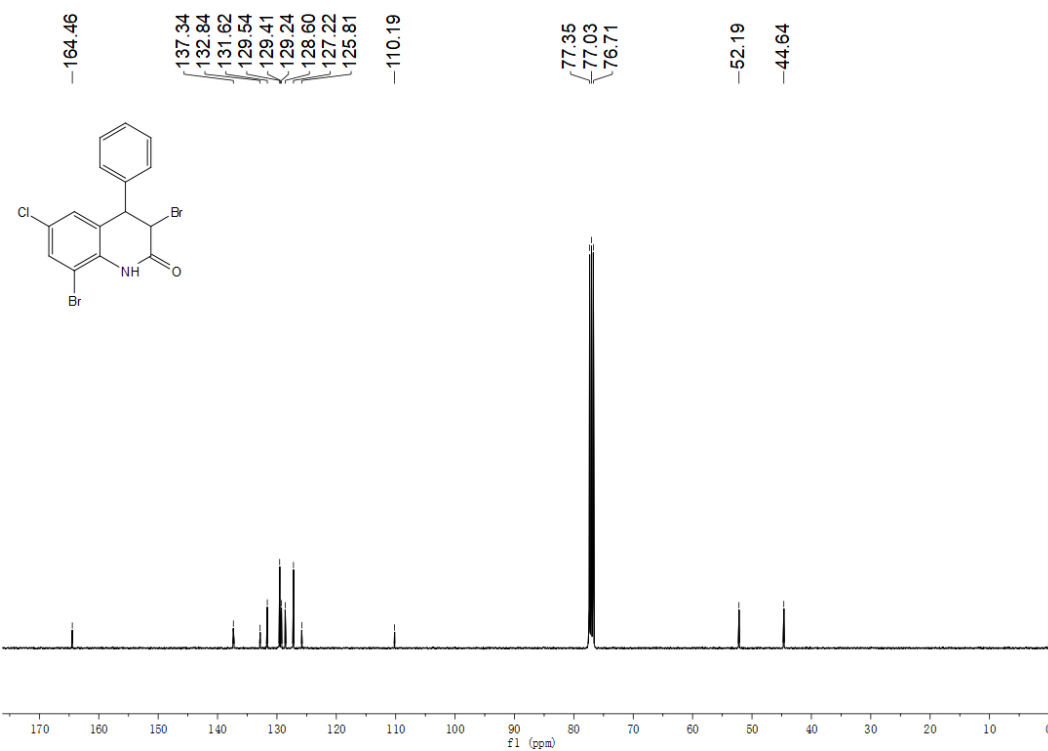

3-bromo-8-methyl-4-phenyl-6-(phenylethynyl) quinoline, **3n**

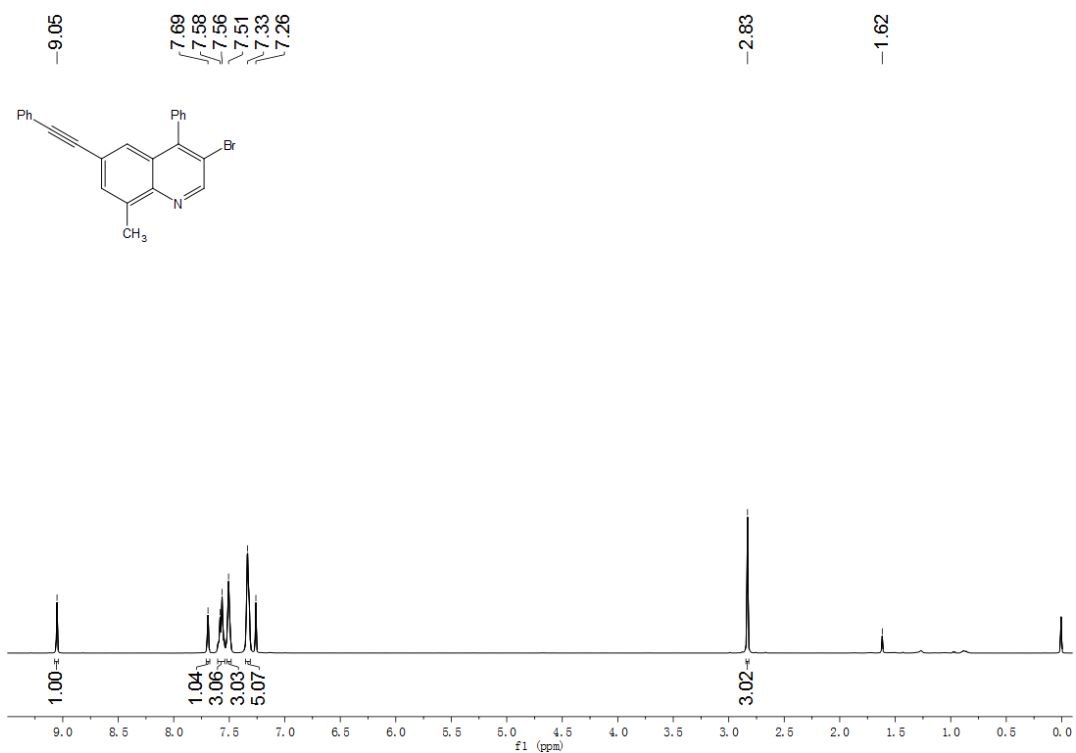

<sup>1</sup>H NMR (25°C, 400 MHz, CDCl<sub>3</sub>)

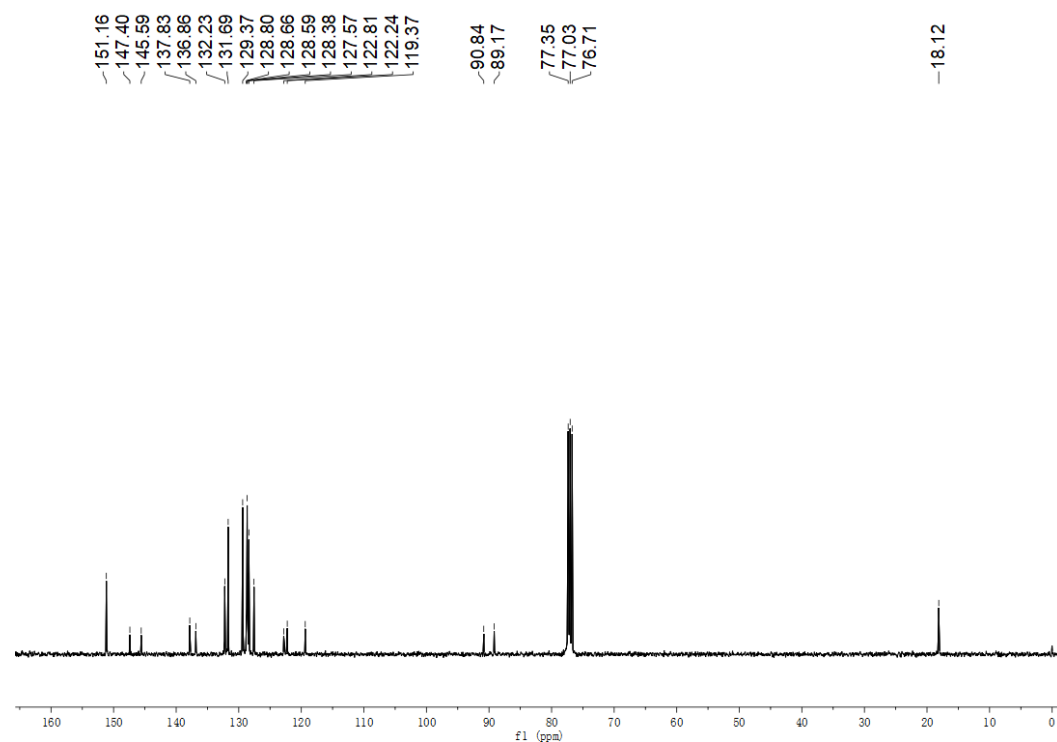

<sup>13</sup>C NMR (25°C, 100 MHz, CDCl<sub>3</sub>)

8-methyl-4-phenyl-6-(phenylethynyl)-3-(*p*-tolyl)quinoline, **4n**

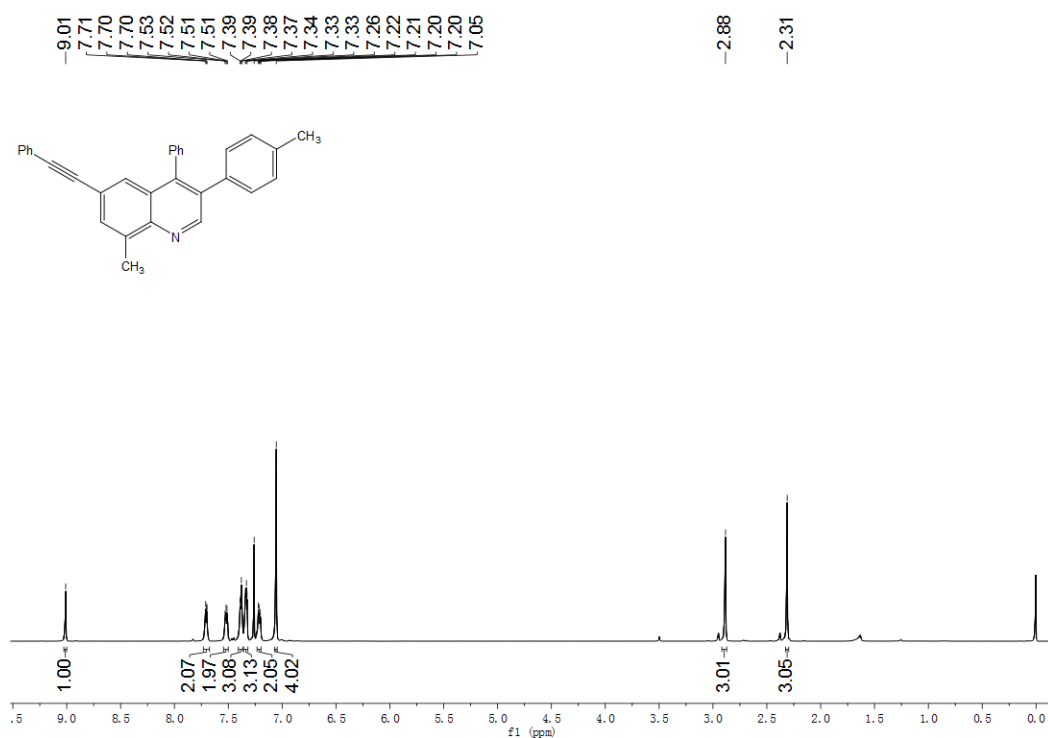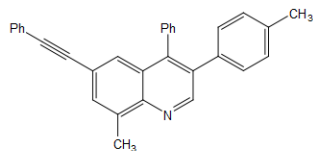

$^1\text{H NMR}$  (25°C, 400 MHz,  $\text{CDCl}_3$ )

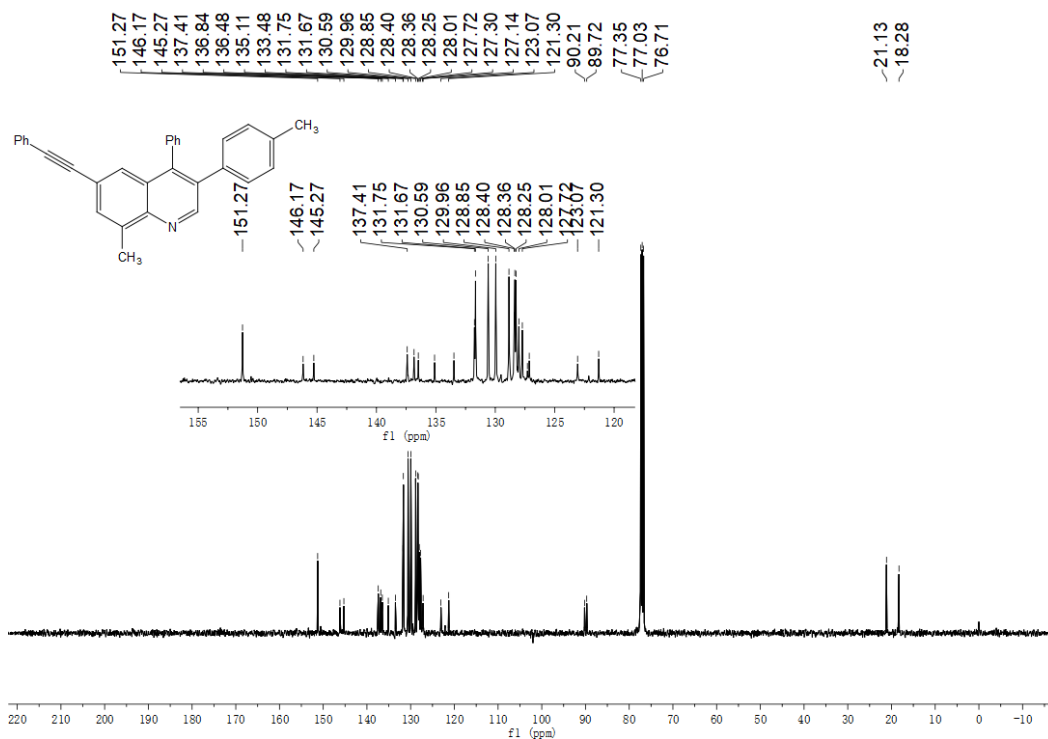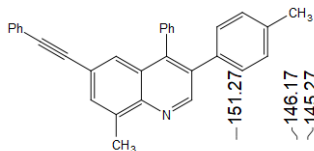

$^{13}\text{C NMR}$  (25°C, 100 MHz,  $\text{CDCl}_3$ )
